## 1 **Cell type-specific prediction of 3D chromatin architecture**

2 Jimin Tan<sup>1</sup>, Javier Rodriguez-Hernaez<sup>2,3</sup>, Theodore Sakellaropoulos<sup>2</sup>, Francesco Boccalatte<sup>2,4</sup>,  
3 Iannis Aifantis<sup>2,4</sup>, Jane Skok<sup>2,4</sup>, David Fenyo<sup>4,5</sup>, Bo Xia<sup>1#</sup>, Aristotelis Tsirigos<sup>2,3,4#</sup>

4

5 <sup>1</sup>Institute for Systems Genetics, New York University School of Medicine, New York, New York

6 <sup>2</sup>Department of Pathology, New York University School of Medicine, New York, New York

7 <sup>3</sup>Applied Bioinformatics Laboratories, New York University School of Medicine, New York, New

8 York

9 <sup>4</sup>Perlmutter Cancer Center, NYU Langone Health, New York, NY

10 <sup>5</sup>Department of Biochemistry and Molecular Pharmacology, New York University School of

11 Medicine, New York, New York

12

13 #Corresponding authors:

14 Aristotelis Tsirigos, [Aristotelis.Tsirigos@nyulangone.org](mailto:Aristotelis.Tsirigos@nyulangone.org); Bo Xia, [Bo.Xia@nyu.edu](mailto:Bo.Xia@nyu.edu)

15

### 16 **Abstract:**

17 The mammalian genome is spatially organized in the nucleus to enable cell type-specific gene  
18 expression. Investigating how chromatin architecture determines this specificity remains a big  
19 challenge. Methods for measuring the 3D chromatin architecture, such as Hi-C, are costly and  
20 bears strong technical limitations, restricting their widespread application particularly when  
21 concerning genetic perturbations. In this study, we present C.Origami, a deep neural network  
22 model for predicting *de novo* cell type-specific chromatin architecture. By incorporating DNA  
23 sequence, CTCF binding, and chromatin accessibility profiles, C.Origami achieves accurate cell  
24 type-specific prediction. C.Origami enables *in silico* experiments that examine the impact of  
25 genetic perturbations on chromatin interactions, and moreover, leads to the identification of a  
26 compendium of cell type-specific regulators of 3D chromatin architecture. We expect Origami –  
27 the underlying model architecture of C.Origami – to be generalizable for future genomics studies  
28 in discovering novel regulatory mechanisms of the genome.

29

30

31 **Introduction:**

32

33 In mammalian cells, interphase chromosomes are hierarchically organized into large  
34 compartments which consist of multiple topologically associating domains (TADs) at the  
35 megabase and sub-megabase scale (Dixon et al., 2012). Chromatin looping within TADs  
36 functions to restrict enhancer-promoter interactions at the kilobase scale for regulating gene  
37 expression (Dixon et al., 2012; Schoenfelder and Fraser, 2019; Tang et al., 2015). The  
38 perturbation of TADs, such as disrupting TAD boundary, can lead to aberrant chromatin  
39 interactions and changes in gene expression (Kloetgen et al., 2020; Narendra et al., 2015). As a  
40 result, mutations that disrupt 3D genome organization can substantially affect developmental  
41 programs and play important roles in genetic diseases and cancer (Franke et al., 2016; Lettice et  
42 al., 2003; Lupiáñez et al., 2015; Spielmann et al., 2018).

43

44 The higher-order organization of the genome is largely determined by intrinsic DNA sequence  
45 features known as *cis*-regulatory elements that are bound by *trans*-acting factors in a sequence  
46 specific manner (Rowley and Corces, 2018). For example, the location and orientation of CCCTC-  
47 binding factor (CTCF) binding sites act as a landmark for defining boundaries of TADs. Other  
48 factors, such as the cohesin proteins, act together to regulate chromatin interaction via loop  
49 extrusion (Rowley and Corces, 2018). While most TADs are conserved across cell types, a  
50 substantial amount (>10%) of TADs are dynamic and vary in different cells (Schmitt et al., 2016).  
51 In addition, widespread cell type-specific chromatin-looping contributes to the precise regulation  
52 of gene expression (Phillips-Cremins et al., 2013; Tang et al., 2015). These fine-scale chromatin  
53 interactions are controlled by chromatin remodeling proteins and cell type-specific transcription  
54 factors such as GATA1 and FOX1A (Kagey et al., 2010; Schoenfelder and Fraser, 2019;  
55 Weintraub et al., 2017). While the general organization of chromatin architecture is largely well  
56 described, the current challenge is to reveal the principles underlying cell type-specific chromatin  
57 folding. Chromatin architecture capture technologies, such as Hi-C, are used for examining  
58 chromatin structure underlying gene regulation at fine-scales and across cell types (Lieberman-  
59 Aiden et al., 2009; Rao et al., 2014). However, these approaches are costly, require large cell  
60 numbers, and are unable to distinguish abnormal genome rearrangements, prohibiting their  
61 widespread applications in investigating how chromatin architecture determines cell type-specific  
62 gene expression, especially in cancer genomes.

63

64 Owing to its ability to model complex interactions, deep learning has emerged as a powerful  
65 strategy for studying genomic features. Application of deep learning models could minimize the  
66 requirement for experimental analyses of chromatin architecture (Eraslan et al., 2019; Zou et al.,  
67 2019). Since intrinsic features in DNA sequence of the genome partially determine its general  
68 folding principles, an approximate prediction of chromatin architecture can be made using  
69 sequence alone (Cao et al., 2021; Fudenberg et al., 2020; Schwessinger et al., 2020). However,  
70 different cell types rely on differential compendia of *trans*-acting factors to establish cell type-  
71 specific chromatin interactions (Rowley and Corces, 2018). Approaches that rely solely on DNA  
72 sequence are unable to predict cell type-specific chromatin interactions (Cao et al., 2021;  
73 Fudenberg et al., 2020; Schwessinger et al., 2020). Conversely, methods that rely only on  
74 chromatin profiles lack the consideration of DNA sequence features, thus generally requiring  
75 multiple epigenomic data to improve predictive power (Belokopytova et al., 2020; Bianco et al.,  
76 2018; Di Pierro et al., 2017; Qi and Zhang, 2019; Yang et al., 2021; Zhang et al., 2019). The  
77 limitations of current methods make it almost impossible to practically carry out *in silico*  
78 experiments for studying how *trans*-acting factors and DNA sequence features work together to  
79 shape chromatin architecture for gene expression regulation.

80

81 We propose that an accurate prediction of cell type-specific chromatin folding requires a model  
82 which effectively recognizes and integrates both DNA sequence features and cell type-specific  
83 genomic information. A practical model should also minimize the requirement for input information  
84 without performance loss. Based on these principles, we developed C.Origami, a deep neural  
85 network that synergistically integrates DNA sequence features and two essential cell type-specific  
86 genomic features, CTCF binding profile (CTCF ChIP-seq signal) and chromatin accessibility  
87 information (ATAC-seq signal). C.Origami achieved accurate prediction of cell type-specific  
88 chromatin architecture in both normal and rearranged genomes. Additionally, the high-  
89 performance of C.Origami enables *in silico* genetic perturbation experiments that interrogate the  
90 impact on chromatin interactions and moreover, allows the identification of cell type-specific  
91 regulators of genomic folding through *in silico* genetic screening. We expect the underlying deep  
92 learning architecture, Origami, to be generalizable for predicting genomic features and  
93 discovering novel genomic regulations.

94

95

96 **RESULTS:**

97 **Origami: a model architecture for predicting cell type-specific genomic features**

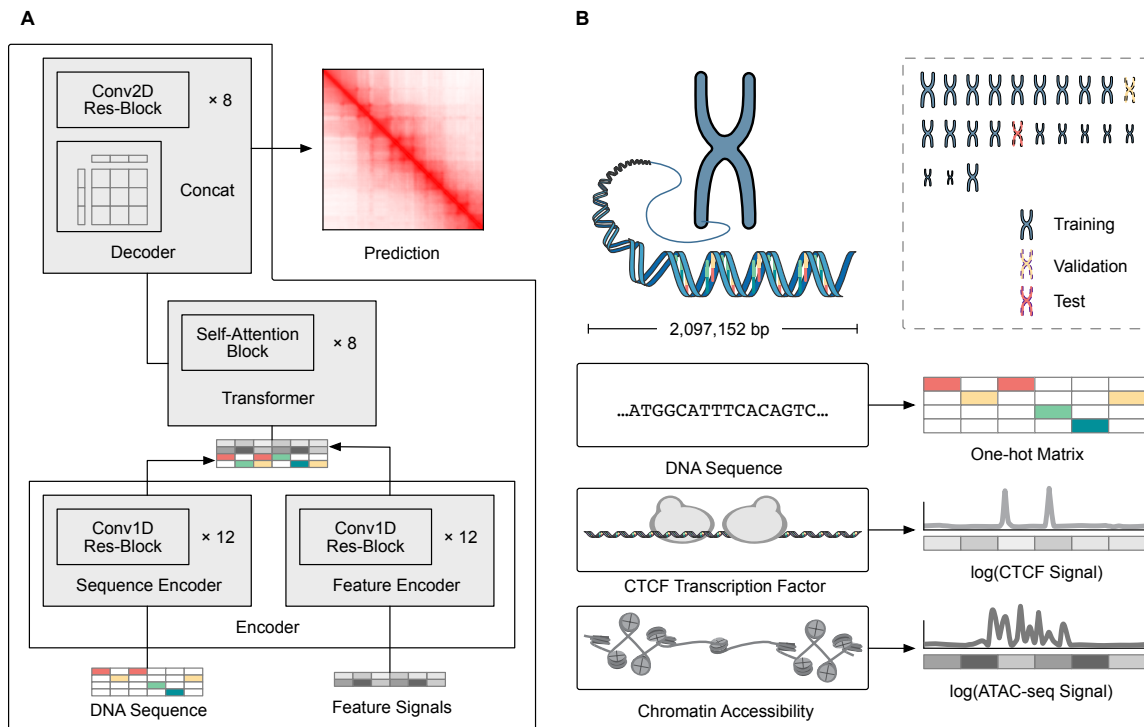

98

99

100 **Figure 1: *de novo* prediction of cell type-specific genomic features with Origami.** **a**, A schematic of  
101 Origami architecture. Origami adopts an encoder-decoder design, separately encoding DNA sequence  
102 features and cell type-specific genomic features. The two streams of encoded information are concatenated  
103 and processed by a transformer module. The decoder converts the processed 1D information to the final  
104 prediction, such as a Hi-C interaction matrix. **b**, Applying Origami model to predicting the Hi-C interaction  
105 matrix. The best-practice model integrates DNA sequence, CTCF ChIP-seq signal and ATAC-seq signal  
106 as input features to predict Hi-C interaction matrix in 2 Mb windows.

106

107

108 To achieve accurate and cell type-specific prediction of genomic features, we first developed  
109 Origami, a general modeling architecture, to synergistically integrate both nucleotide-level DNA  
110 sequence and cell type-specific genomic signal (Fig. 1a). In these two streams of information, the  
111 former enables recognition of informative sequence motifs, while the later provides cell type-  
112 specific features. The Origami architecture consists of two encoders, a transformer module and  
113 a decoder (Fig. 1a, see Methods). The two encoders process DNA sequence and genomic  
114 features independently. The encoded features are concatenated and further processed by a  
115 transformer model (Vaswani et al., 2017), which allows the encoded information to exchange  
116 between different genomic regions. The decoder in Origami synthesizes the processed  
117 information to make predictions, and depending on the task, can be customized to specific

118 downstream prediction targets. In this study, we deployed a decoder for predicting chromatin  
119 architecture represented by Hi-C contact matrices, and therefore named this variant C.Origami.

120

121 To cover typical TADs in the genome while maximizing computation efficiency, C.Origami predicts  
122 chromatin architecture within a 2 mega-base (2Mb) sized genomic window (Dixon et al., 2012).  
123 DNA sequence and genomic features within the 2Mb window were separately encoded as  
124 nucleotide-level features (Fig. 1b, see Methods). The model reduces 2Mb wide genomic features  
125 down to 256 bins, and output a Hi-C contact matrix with a bin size of 8,192 bp resolution (see  
126 Methods). The target Hi-C matrix from the corresponding 2Mb genomic window was processed  
127 to have the same bin size. To train the model, we used data from IMR-90 (Rao et al., 2014), a  
128 fibroblast cell line isolated from normal lung tissue, and randomly split the chromosomes into  
129 training, validation (chromosome 10), and test set (chromosome 15) (Fig. 1b, top right).

130

131 To select genomic features as input for cell type-specific chromatin architecture prediction, we  
132 considered three criteria: 1) representative for cell type-specific identity; 2) widely available and  
133 experimentally robust; 3) minimized number of features to enable broad applicability of the model.  
134 CTCF binding is one of the most critical determinants of 3D genome architecture, thus we initially  
135 trained the model using DNA sequences and CTCF ChIP-seq signals as the only cell type-specific  
136 genomic feature (Supplementary Fig. 2). Our model performed well in most predictions, capturing  
137 the TAD structures and chromatin interaction events (Supplementary Fig. 2). However, we found  
138 the prediction did not recognize some fine-scale chromatin interaction features, especially in *de*  
139 *novo* prediction on a cell type (Supplementary Fig. 2). These results indicate that integrating DNA  
140 sequence with CTCF binding signal alone is not sufficient for optimal prediction of cell type-  
141 specific 3D genome conformation.

142

143 Previous studies indicate that chromatin accessibility directly or indirectly affects genome  
144 conformation with cell type-specific interactions (Stergachis et al., 2014; Thurman et al., 2012).  
145 We thus improved the model by including ATAC-seq signals as an extra feature (Fig. 1b). We  
146 found that C.Origami trained with nucleotide-level DNA sequence, CTCF ChIP-seq, and ATAC-  
147 seq signals provided high-quality predictions for chromatin architecture (Fig. 2). On validation  
148 chromosome 10 and test chromosome 15, C.Origami predicted highly accurate contact matrices  
149 that emphasized both large topological domains and detailed chromatin looping events (Fig. 2a-  
150 c and Supplementary Fig.3). To quantify prediction performance, we calculated the insulation  
151 scores from the predicted Hi-C matrix and found a high correlation with the insulation scores

152 calculated from the experimental data (Fig. 2d). C.Origami achieved on average 0.95 and 0.94  
 153 Pearson correlation coefficients on validation and test chromosomes, respectively (Fig. 2e). We  
 154 found that DNA sequence, CTCF binding signal, and chromatin accessibility signal were all  
 155 required to accurately predict Hi-C contact matrix with high-quality. Compromising any of the  
 156 signals led to inaccurate prediction (Supplementary Fig. 4).  
 157  
 158

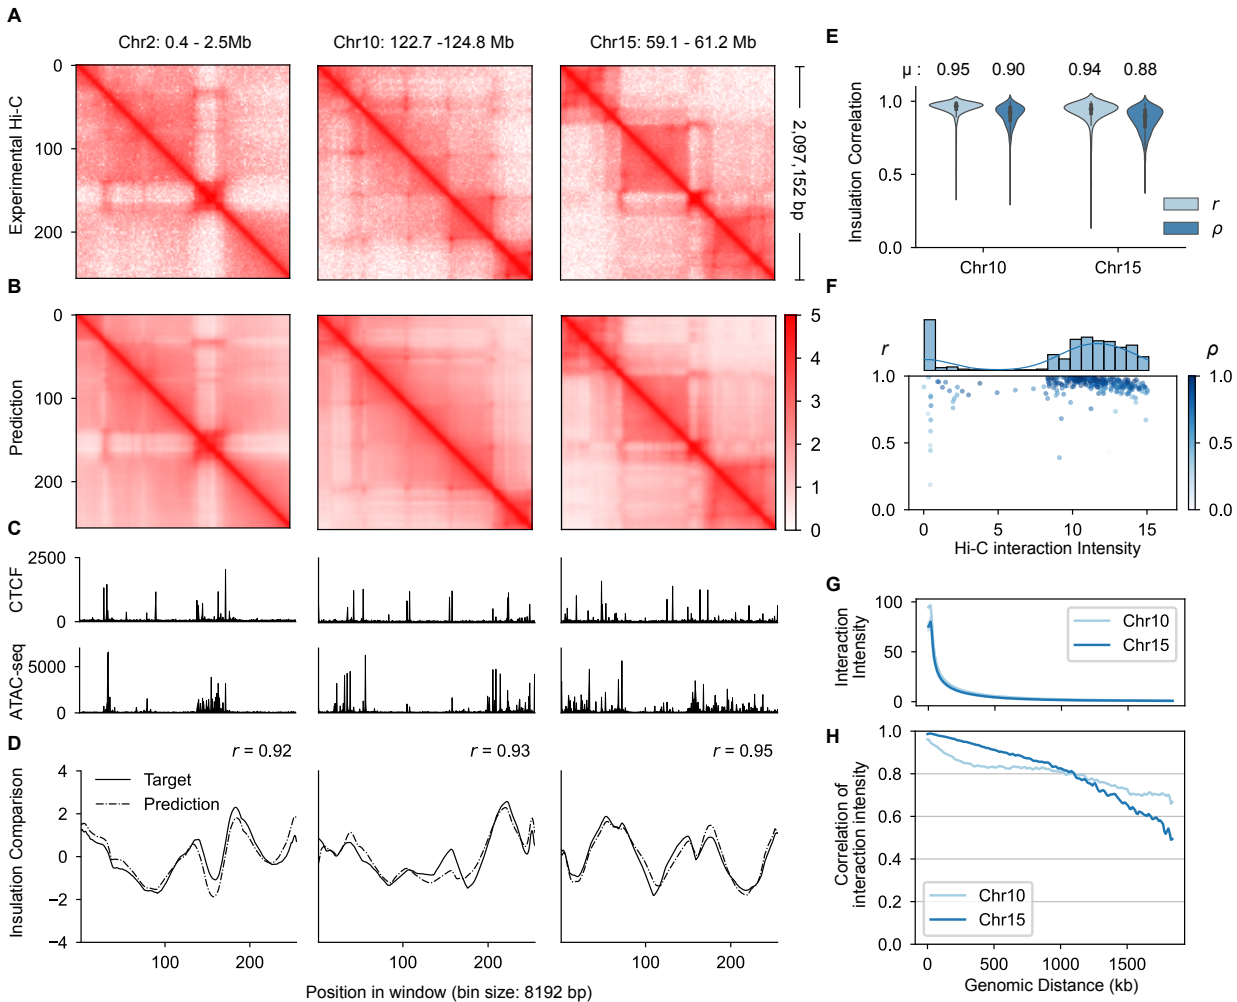

159  
 160 **Figure 2: C.Origami accurately predicts 3D chromatin architecture.** a-b, Experimental Hi-C matrices  
 161 (a) and C.Origami predicted Hi-C matrices (b) of IMR-90 cell line at chromosome 2 (left), chromosome 10  
 162 (middle), and chromosome 15 (right), representing training, validation and test chromosomes, respectively.  
 163 c, Input CTCF binding profiles and chromatin accessibility profiles. d, Insulation scores calculated from  
 164 experimental Hi-C matrices (solid line) and C.Origami predicted Hi-C matrices (dotted line). Pearson  
 165 correlation coefficients comparing the insulation was indicated in the plots. e, Insulation correlation between  
 166 predicted and experimental Hi-C matrices across all windows in both validation and test chromosomes.

167 Each group included both Pearson correlation ( $r$ ) and Spearman correlation ( $\rho$ ) coefficients. **f**, The  
168 distribution of experimental Hi-C intensity scores by insulation correlation (Pearson's  $r$ ) between prediction  
169 and experiment. Each point represents a 2Mb genomic window in chromosome 15 (test). Colormap  
170 indicates the Spearman's  $\rho$  of insulation correlation between prediction and experiment. **g**, Average  
171 intensity of the interaction matrix across genomic distances. **h**, Distance-stratified interaction correlation  
172 (Pearson) between prediction and experiment.

173

174

175 We carried out multiple different measurements to further evaluate the performance of C.Origami.  
176 First, by plotting the insulation correlation between prediction and experiment against Hi-C data  
177 intensity, we found that the predictions in the test set maintain uniform high performance across  
178 different clusters, demonstrating the robustness of the model (Fig. 2f). The few data points with  
179 low intensity are regions corresponding to unmappable or repeat sequences such as centromeres  
180 and telomeres (Fig. 2f and Supplementary Fig. 5). Second, our predicted Hi-C contact map  
181 followed the exponential decay pattern that are generally present in experimental Hi-C data (Fig.  
182 2g). Third, we plotted the distance-stratified interaction correlation (Pearson) between prediction  
183 and experiment. C.Origami achieved correlation above 0.8 within 1Mb region and 0.6 within  
184 1.5Mb (Fig. 2h). Last, we found that predictions from C.Origami were highly consistent across  
185 neighboring regions (Supplementary Fig. 6). Thus, C.Origami can be used to construct  
186 chromosome-wide prediction of Hi-C contact matrix by joining predictions across sliding windows.  
187 Together, the results demonstrate that C.Origami can accurately predict 3D chromatin  
188 architecture with minimum input data.

189

190

191 ***De novo* prediction of cell type-specific chromatin architecture**

192

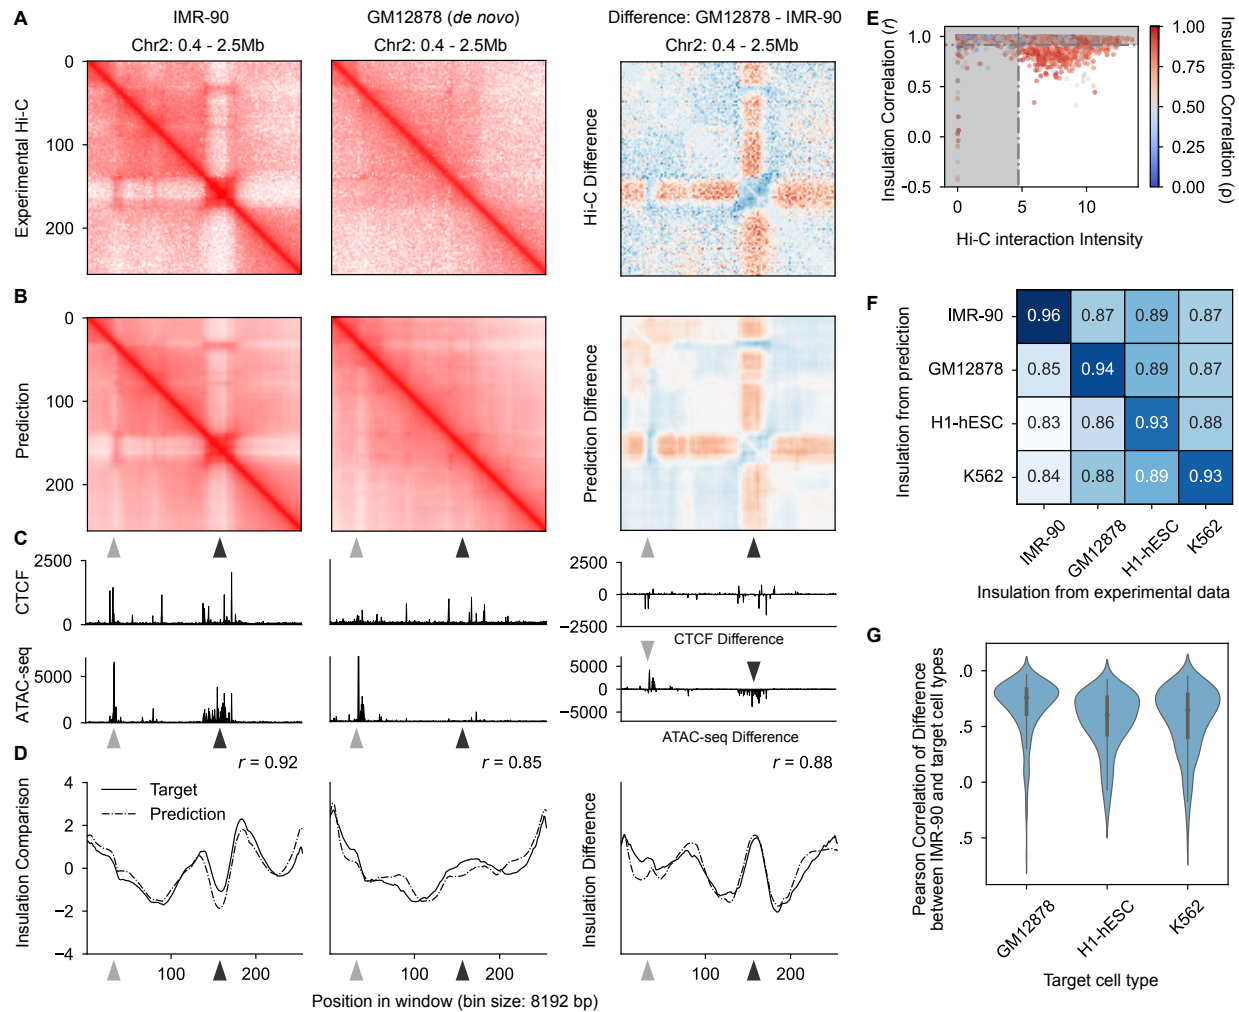

193  
 194 **Figure 3: Cell type-specific *de novo* prediction of chromatin structure.** **a**, Experimental Hi-C matrices  
 195 from IMR-90 (left) and GM12878 (middle) cell lines at chromosome 2, highlighting cell type-specific  
 196 chromatin differences (right). **b**, C.Origami-predicted Hi-C matrices of IMR-90 (left) and GM12878 (middle),  
 197 precisely recapitulated the experimental Hi-C matrices (**a**). The arrow heads highlighted differential  
 198 chromatin interactions between the two cell types. **c**, CTCF binding profiles and chromatin accessibility  
 199 profiles of IMR-90 (left), GM12878 (middle) and their difference (right). **d**, Insulation scores calculated from  
 200 experimental Hi-C matrices (solid line) and C.Origami predicted Hi-C matrices (dotted line) of IMR-90 (left),  
 201 GM12878 (middle) and their difference (right). **e**, The distribution of interaction intensity by insulation  
 202 correlation (Pearson) between the experimental Hi-C matrices of IMR-90 and GM12878. Colormap  
 203 indicates the corresponding Spearman correlation coefficient ( $\rho$ ). Dotted lines denote the filtering criteria in  
 204 selecting representative loci with cell-type specificity. **f**, Pearson correlation between insulation scores  
 205 calculated from predicted and experimental Hi-C matrices across cell types. Prediction from each cell type  
 206 was similar to the corresponding experimental data. **g**, Pearson's  $r$  of predicted insulation difference and  
 207 experimental insulation difference between IMR-90 and other cell types. The correlation was calculated as:



208 Pearson( $Insu(IMR-90\_pred) - Insu(Target\_pred)$ ,  $Insu(IMR-90\_data) - Insu(Target\_data)$ ). High correlation  
209 indicates that our model detected cell types-specific features applicable across different cell types.

210

211

212 We next tested whether our model generalizes to *de novo* predict of chromatin architecture in  
213 new cell types. GM12878, a lymphoblastoid cell line, differs substantially from IMR-90 in its  
214 chromatin architecture (Rao et al., 2014), as exemplified at locus Chr2:400,000-2,497,152 (Fig.  
215 3a). Specifically, we highlighted a cell type-specific interaction related to chromatin accessibility  
216 changes (black arrowhead) and a distal interaction that associates with both CTCF and ATAC-  
217 seq signal changes (gray arrowhead, Fig. 3c). These cell type-specific features were clearly  
218 demonstrated by differences in their signal intensity in Hi-C and genomic tracks (Fig. 3a and 3c,  
219 right). To evaluate how C.Origami performs in *de novo* predicting cell type-specific chromatin  
220 architecture, we applied the prediction to both cell types at this locus. We found that the cell type-  
221 specific chromatin interactions were accurately captured in our prediction, and matched with the  
222 experimental Hi-C contact matrix in both cell types (Fig. 3b). The calculated insulation scores from  
223 the predicted Hi-C matrix were also highly correlated with the scores of the experimental data  
224 from both cell types (Fig. 3d, left and middle). In addition, the difference between insulation scores  
225 of the two cell types were highly correlated (Fig. 3d, right). We further expanded the *de novo*  
226 chromatin architecture prediction to two more cell lines, embryonic H1-hESC and erythroleukemia  
227 K562. Again, our model achieved accurate predictions of cell type-specific chromatin architecture  
228 with high specificity, demonstrating the robustness of C.Origami in *de novo* prediction and its  
229 practical potential for general application (Supplementary Fig. 7).

230

231 To systematically evaluate our model, we next assessed its performance across the genome.  
232 Although we presented accurate prediction results of multiple loci that have cell type-specific  
233 chromatin structures, most TAD boundaries are conserved across cell types (Schmitt et al., 2016).  
234 Therefore, we aimed to test the model on a subset of 2Mb loci with differential chromatin  
235 structures between IMR-90 and GM12878. Regions with normal intensity (> 10% intensity  
236 quantile) and low similarity (< 20% insulation difference) between the experimental Hi-C matrices  
237 of the two cell types were selected. In total, ~15% of the entire genome (~450Mb) were included  
238 for evaluating the performance of cell type-specific Hi-C prediction (Fig. 3e).

239

240 We calculated the correlation coefficient between the insulation scores of the predicted and  
241 experimental Hi-C matrices across all four cell types (Supplementary Fig. 7). In line with

242 observations from the single locus experiment (Fig. 3a-d, Supplementary Fig. 7), we found that  
243 predictions using input features from one cell type has the highest correlation coefficients with the  
244 experimental Hi-C data of the same cell type (Fig. 3f, scores at the diagonal line). The correlation  
245 coefficients between prediction and experimental data from different cell types were lower,  
246 consistent with the expectation that the model predicts cell type-specific chromatin interactions  
247 (Fig. 3f). Similarly, these results were recapitulated by correlation analysis using pixel-level  
248 Observed/Expected contact matrices (Supplementary Fig. 8a-b). As a control, we performed a  
249 similar analysis using structurally conserved genomic regions, characterized by normal intensity  
250 (> 10% intensity quantile) and high similarity (> 20% insulation difference), between IMR-90 and  
251 GM12878 (Supplementary Fig. 8c). As expected, we found the prediction in these regions was  
252 highly correlated with the experimental data across all cell types (Supplementary Fig. 8d-e).

253  
254 To quantify the performance of C.Origami in predicting cell type-specific chromatin architecture  
255 across the genome, we calculated the insulation difference between Hi-C matrices of IMR-90 to  
256 that of the three other cell lines using predicted or experimental data (Fig. 3g). We then computed  
257 the correlation between the cell-type insulation differences calculated from prediction and that  
258 from the experimental data. We found that all comparisons yielded high correlations between  
259 prediction and experimental data (Fig. 3g), indicating that C.Origami accurately detected the  
260 chromatin architecture difference across cell types comparable to that detected from experimental  
261 Hi-C technique.

262  
263 We further compared the performance of C.Origami to Akita, a deep learning model trained on  
264 DNA sequence alone for predicting Hi-C contact matrix (Fudenberg et al., 2020). We found  
265 C.Origami outperformed Akita and made accurate cell type-specific predictions regardless of loci  
266 (Supplementary Fig. 9). Together, our results indicate that C.Origami trained with DNA sequence,  
267 CTCF binding and chromatin accessibility signals performs optimal in *de novo* predicting high-  
268 quality Hi-C contact matrix, and sensitively captures cell type-specific chromatin folding features.

269  
270

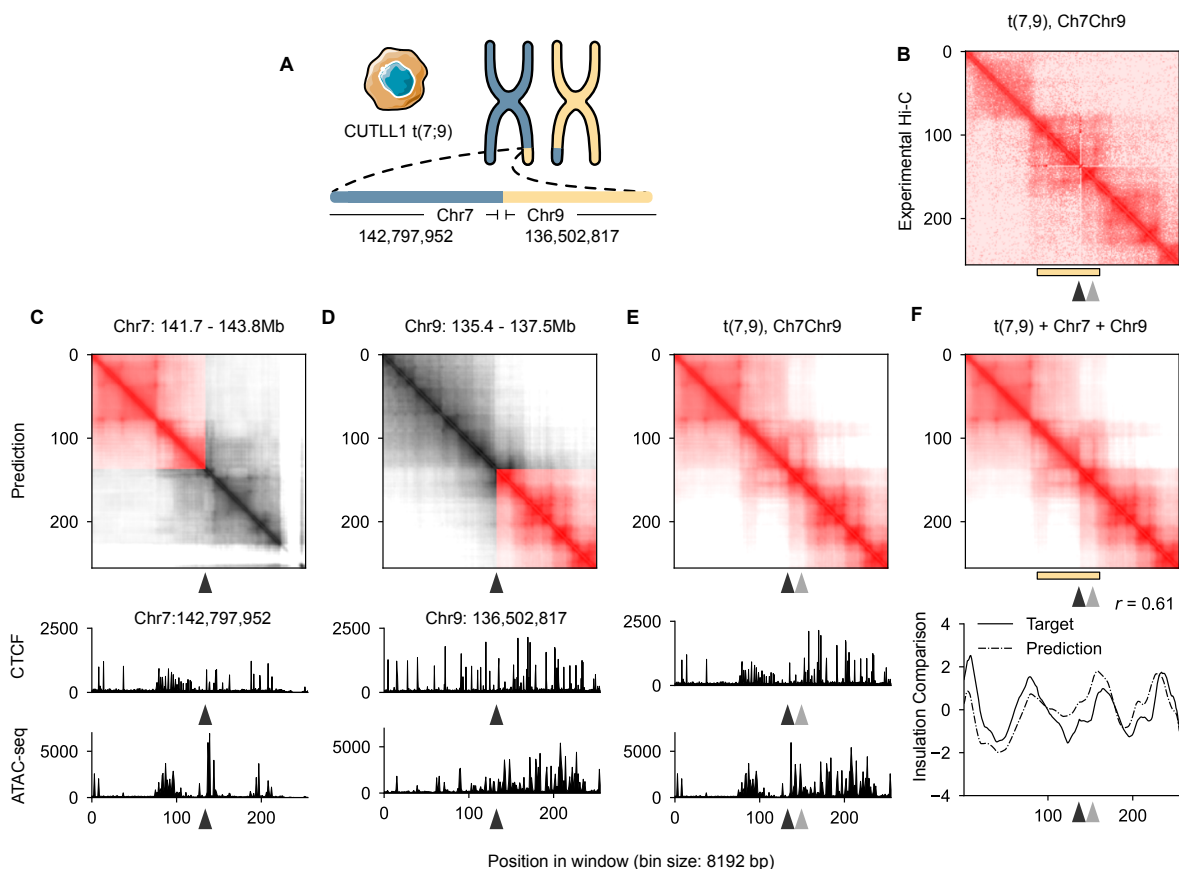

271  
 272 **Figure 4: C.Origami enables allele-specific prediction of 3D chromatin architecture in rearranged**  
 273 **cancer genome.** **a**, Chromosomal translocation between chromosome 7 and chromosome 9 in CUTLL1 T  
 274 cell leukemia cells (Palomero et al., 2006). **b**, Experimental Hi-C data mapped to a custom reference  
 275 chromosome with t(7,9) translocation (Kloetgen et al., 2020). **c-d**, C.Origami prediction of chromatin  
 276 architecture of chromosome 7 (**c**) and chromosome 9 (**d**) in CUTLL1 cells. The windows represented intact  
 277 chromosomal loci around the translocation sites in CUTLL1 cells. **e**, C.Origami prediction of chromatin  
 278 architecture at the t(7,9) translocation locus. **f**, A simulated Hi-C contact matrix using prediction for  
 279 mimicking of experimental mapping results. The simulated result was averaged from the prediction of both  
 280 normal and translocated alleles. The simulated Hi-C matrix was aligned to the experimental Hi-C matrix (**b**),  
 281 with highlights for the neo-TAD at the translocation locus (yellow bar). Black arrowhead indicates the  
 282 translocation site. The grey arrowhead indicates a stripe in the neo-TAD.

283  
 284  
 285 **Allele-specific prediction in rearranged cancer genomes**  
 286 Chromosomal translocations and other structural variants generate novel recombined DNA  
 287 sequences, subsequently inducing new chromatin interactions which may be critical in  
 288 tumorigenesis and progression (Rabbitts, 1994; Spielmann et al., 2018). However, the allelic

289 effect of translocation and structural variations frequently seen in cancer genomes makes it  
290 challenging to distinguish the chromatin architecture of the variant chromosome from a normal  
291 one. For example, CUTLL1, a T cell leukemia cell line, incorporated a heterozygous t(7,9)  
292 translocation where the end of chromosome 7 is recombined with chromosome 9 (Palomero et  
293 al., 2006) (Fig. 4a). The translocation introduces new CTCF binding signals from chromosome 9  
294 to chromosome 7 (Kloetgen et al., 2020). Experimental Hi-C in CUTLL1 cells detected the  
295 formation of a neo-TAD at the translocation locus when mapped to a custom CUTLL1 reference  
296 genome (Fig. 4b). However, due to the limitation in mapping sequencing data to the reference  
297 genome, experimental Hi-C measures chromatin architecture allele-agnostically, and is thus  
298 unable to quantify allele-specific translocation.

299

300 To examine the performance of C.Origami in predicting chromatin architecture from recombined  
301 cancer genomes, we applied the model to 2Mb windows centered at the translocation breakpoint  
302 in CUTLL1 cells (Fig. 4c-e). We first predicted the Hi-C contact matrices referring to normal alleles  
303 at chromosome 7 and chromosome 9 (Fig. 4c-d). Since the input CTCF ChIP-seq and ATAC-seq  
304 profiles can only be mapped allele-agnostically, our prediction used these inputs as an  
305 approximation. Then we simulated the translocation by fusing DNA sequences at the breakpoint  
306 in Chromosome 7 (q34) to the Chromosome 9 (q34) breakpoint together with all genomic features  
307 (see Methods). The predicted Hi-C map from translocation detected a neo-TAD forming between  
308 the two recombined chromosomes (Fig. 4e). Specifically, we found a stripe extending from  
309 translocated chromosome 9 to chromosome 7, indicating a novel regulation in the recombined  
310 chromosome (Fig. 4e, gray arrowhead). We next averaged the Hi-C contact matrix from normal  
311 and translocated alleles, mimicking the allele-agnostic Hi-C mapping in the experimental data,  
312 and found a high correlation between the two (Fig. 4b and 4f, see Methods). The high-accuracy  
313 in prediction underscores the potential of applying C.Origami in future cancer genomics studies.

314

### 315 **Transferring knowledge learned from human genome to predict mouse chromatin** 316 **architecture**

317 The mouse genome differs from human in its genomic components but the two share similar  
318 mechanisms in 3D chromatin organization (Cheng et al., 2014; Dixon et al., 2012; Stergachis et  
319 al., 2014). We sought to test whether C.Origami could apply knowledge learned from human  
320 genome to a different species. In an initial trial, we found that our model trained with DNA  
321 sequences and dense genomic features (e.g. bigwig tracks) did not achieve good performance.  
322 We hypothesized that the background intensity in dense features can be highly specific to species

323 and thus such knowledge learned from dense profiles in human made it challenging to transfer to  
324 the mouse.

325

326 We expect sparse features such as peaks to be less specific, and more consistent across species.  
327 To achieve cross-species prediction using a model trained with human data, we modified our  
328 input data by performing a peak-calling step on the CTCF CHIP-seq and ATAC-seq profiles and  
329 used such sparse genomic features as input for training and prediction (see Methods). We  
330 confirmed that using sparse input genomic features did not significantly undermine the model's  
331 prediction performance in human (Supplementary Fig. 10). Testing the model trained on sparse  
332 features of human IMR-90 cell line for mouse prediction, we found it capable of predicting mouse  
333 chromatin architecture with good quality, indicating the power of C.Origami for transferring the  
334 conserved genomic features learned from different species (Supplementary Fig. 11).  
335 Notwithstanding the good performance, the accuracy of C.Origami can be further improved by  
336 training on mouse data to adapt to mouse sequence and genomic features.

337

338 **High-accuracy prediction of C.Origami enables cell type-specific *in silico* genetic**  
339 **experiments**

340

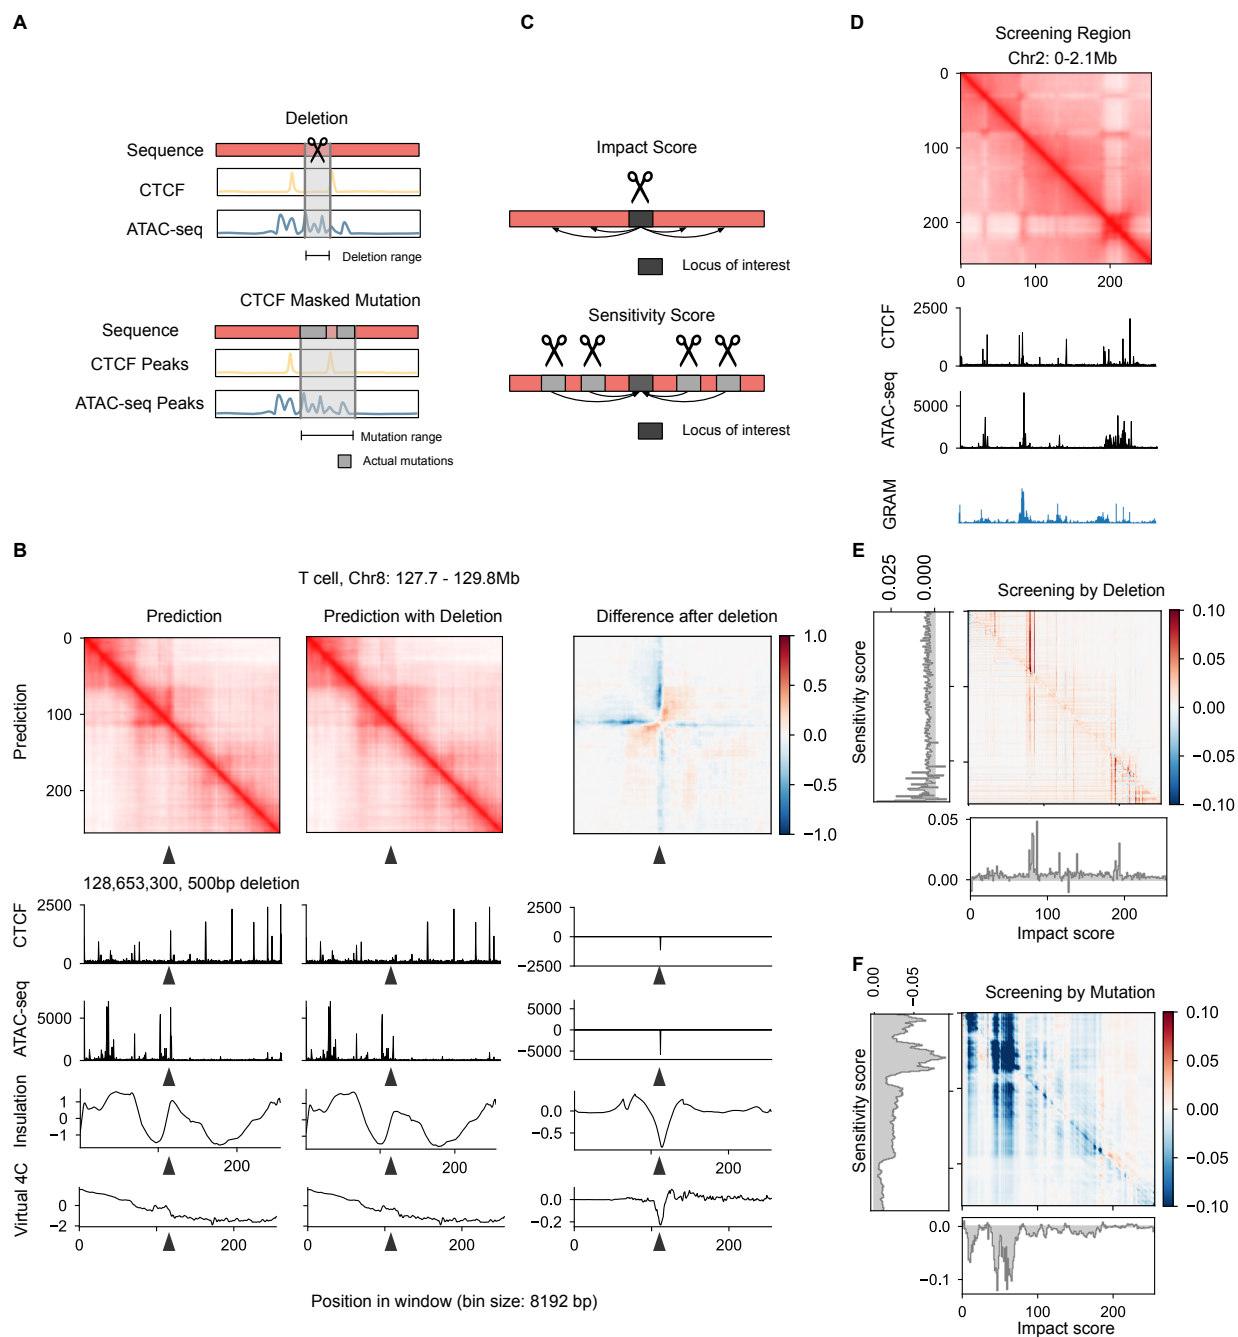

341  
 342 **Figure 5, *In silico* genetic experiments for identifying *cis*-regulatory elements determining**  
 343 **chromatin architecture.** **a**, Schematic of *in silico* deletion and masked mutation experiments. A deletion  
 344 experiment completely removed both DNA sequences and genomic signals, while a masked mutation  
 345 experiment shuffled DNA sequence but not the genomic peaks and their underlying DNA sequences. **b**, A  
 346 500bp deletion in chromosome 8 led to chromatin looping changes in T cells. The presented 2Mb window  
 347 starts at the promoter region of *MYC*, and the experimental deletion perturbed a CTCF binding site at the  
 348 arrowhead location (Kloetgen et al., 2020). The presented results include C.Origami prediction of the Hi-C

349 contact matrices with (middle) or without (left) the deletion, and their difference (right). The virtual 4C signal,  
350 calculated from the predicted Hi-C matrices, is shown at the bottom. **c**, Schematic of impact score that  
351 indicates how perturbation of one locus affected the local chromatin folding, and sensitivity score that  
352 indicates how sensitive a locus is to genetic perturbations in neighboring areas. **d**, GRAM score, indicating  
353 the contribution of genomic location to the predicted Hi-C matrix. **e-f**, Sliding-window deletion screening (**e**)  
354 and CTCF-masked mutation screening (**f**) across a 2Mb window corresponding to **d**. Impact and sensitivity  
355 scores were shown on the horizontal and vertical axis, respectively. CTCF peak and its DNA sequences  
356 were masked to prevent disruption of CTCF signal. Arrowhead in **f** indicates a potential regulatory elements  
357 free of CTCF binding and ATAC-seq signals.

358

359 The high accuracy of C.Origami allowed us to perform cell type-specific *in silico* experiments, and  
360 therefore enabled studying how chromatin interaction may be altered upon genetic perturbation.  
361 Deletions and mutations are two common types of perturbations in genetic studies. Deletion  
362 removes all three types of input features at the perturbed locus, and can lead to a TAD merge  
363 event in experiments (Narendra et al., 2015) (Fig. 5a, top). Instead of experimentally performing  
364 such genetic studies, we modelled deletions of TAD boundary sequences in IMR-90 cells *in silico*,  
365 and subsequently predicted local chromatin interaction maps with C.Origami. We found that *in*  
366 *silico* deletion at TAD boundaries led to TAD merging events of the originally insulated adjacent  
367 TADs and a sharp drop in insulation score (Supplementary Fig. 12), indicating the impact of this  
368 genetic alteration.

369

370 To further investigate the validity of *in silico* genetic experiments, we applied C.Origami to predict  
371 chromatin interactions surrounding the *MYC* locus which was experimentally perturbed in T cells  
372 (Kloetgen et al., 2020). Our previous study showed that disrupting a CTCF-binding site near *MYC*  
373 reduced the chromatin looping efficiency in T cells, resulting in a reduced insulation score  
374 (Kloetgen et al., 2020). Applying C.Origami at the locus, we found a stripe in the predicted Hi-C  
375 matrix (Fig. 5b, left, arrowhead), while a 500bp *in silico* deletion covering the perturbed CTCF-  
376 binding signal attenuated such interaction (Fig. 5b, middle and right). Based on our predicted Hi-  
377 C matrices, we calculated virtual 4C profiles after perturbing the CTCF binding site and found  
378 them to be consistent with the experimental data (Supplementary Fig. 7E in Kloetgen, *et*  
379 *al*)(Kloetgen et al., 2020).

380

### 381 **Cell type-specific *in silico* genetic screen of *cis*-regulatory elements**

382 To determine whether C.Origami could be used to identify *cis*-regulatory elements affecting  
383 chromatin folding using *in silico* genetic screening, we developed two different approaches:

384 gradient-based scoring and perturbation-based approaches (Fig. 5c-f). In the gradient-based  
385 approach, we defined a GRAM (Gradient-weighted Regional Activation Mapping) score to  
386 estimate how significant each genomic site contributed to the prediction of the final Hi-C matrix  
387 (Fig. 5c, see Methods). We found GRAM score precisely captured important genomic regions that  
388 determine 3D genome structure such as TAD boundaries (Fig. 5d).

389

390 To orthogonally demonstrate the capability of C.Origami in discovering novel regulation of  
391 chromatin architecture, we carried out *in silico* genetic screening experiments with systematic  
392 perturbation. We divided the window into 256 perturbation regions of ~8kb, followed by deletion  
393 and prediction across the whole 2Mb window (see Methods). This process produced a mapping  
394 of intensity shift at each perturbed region. We defined the impact score to measure the  
395 contribution of a locus on chromatin architecture within the 2Mb window (Fig. 5c, top). This was  
396 calculated as the average intensity change of the entire 2Mb window after perturbation of a given  
397 locus. We also defined a sensitivity score to measure how sensitive a locus is to the perturbations  
398 of its surrounding region (Fig. 5c, bottom). We calculated it as the average intensity change of  
399 one locus when every region in a 2Mb window is perturbed. We found that deletion at TAD  
400 boundaries with enriched CTCF ChIP-seq peaks had the highest impact on chromatin folding in  
401 the *in silico* screening experiment (Fig. 5d-e). This result is consistent with the fact that CTCF  
402 binding is a key signal in determining TAD boundaries, and its deletion can lead to alteration of  
403 TAD structure, thereby changing the overall intensity of neighboring regions (Kloetgen et al., 2020;  
404 Narendra et al., 2015).

405

406 To discover CTCF-independent factors regulating chromatin interaction, we performed an *in silico*  
407 screening through CTCF-masked mutagenesis (referred to as mutation) experiment. We first  
408 selected a perturbation region and masked the CTCF peaks and their underlying DNA sequences.  
409 We then performed the mutation experiment of the given region by shuffling unmasked DNA  
410 sequences, followed by a prediction from C.Origami on the 2Mb genomic window (see Methods).  
411 We then calculated the impact and sensitivity scores similar to the *in silico* deletion screening. By  
412 masking CTCF peaks and its underlying sequence, mutation screening allowed us to identify  
413 multiple CTCF-independent genomic elements that might be critical for chromatin architecture,  
414 including regions free of ATAC-seq signal (Fig. 5f, arrowhead). In contrast, we found sensitivity  
415 scores were more similar for loci within the same TADs than those across different TADs,  
416 consistent with the expectation that the deletion perturbation is likely to cause intensity shifts  
417 within the TAD (Fig. 5f). Together, our data show that C.Origami can be used to systematically



418 identify how *cis*-regulatory elements affect chromatin folding in high-throughput *in silico* genetic  
419 screening.

420

421

422 **Genome-wide *in silico* screening revealed canonical and novel regulators of chromatin**  
423 **folding**

424 We next asked whether C.Origami could identify a compendium of *trans*-acting regulators  
425 determining the chromatin interactions in a cell-type specific scenario. We first systematically  
426 scanned through the whole genome to discover genomic loci that were critical for predicting  
427 chromatin architecture in IMR-90 cells. We separately applied *in silico* deletion and mutation  
428 experiments across the entire genome and calculated the impact score at each 20Kb locus. The  
429 DNA sequence of the perturbed loci with high impacts – positive or negative – were designated  
430 as potential functional elements for subsequent analysis with LOLA (Locus OverLap Analysis for  
431 enrichment of genomic ranges) (Sheffield and Bock, 2016) (Fig. 6a).

432

433

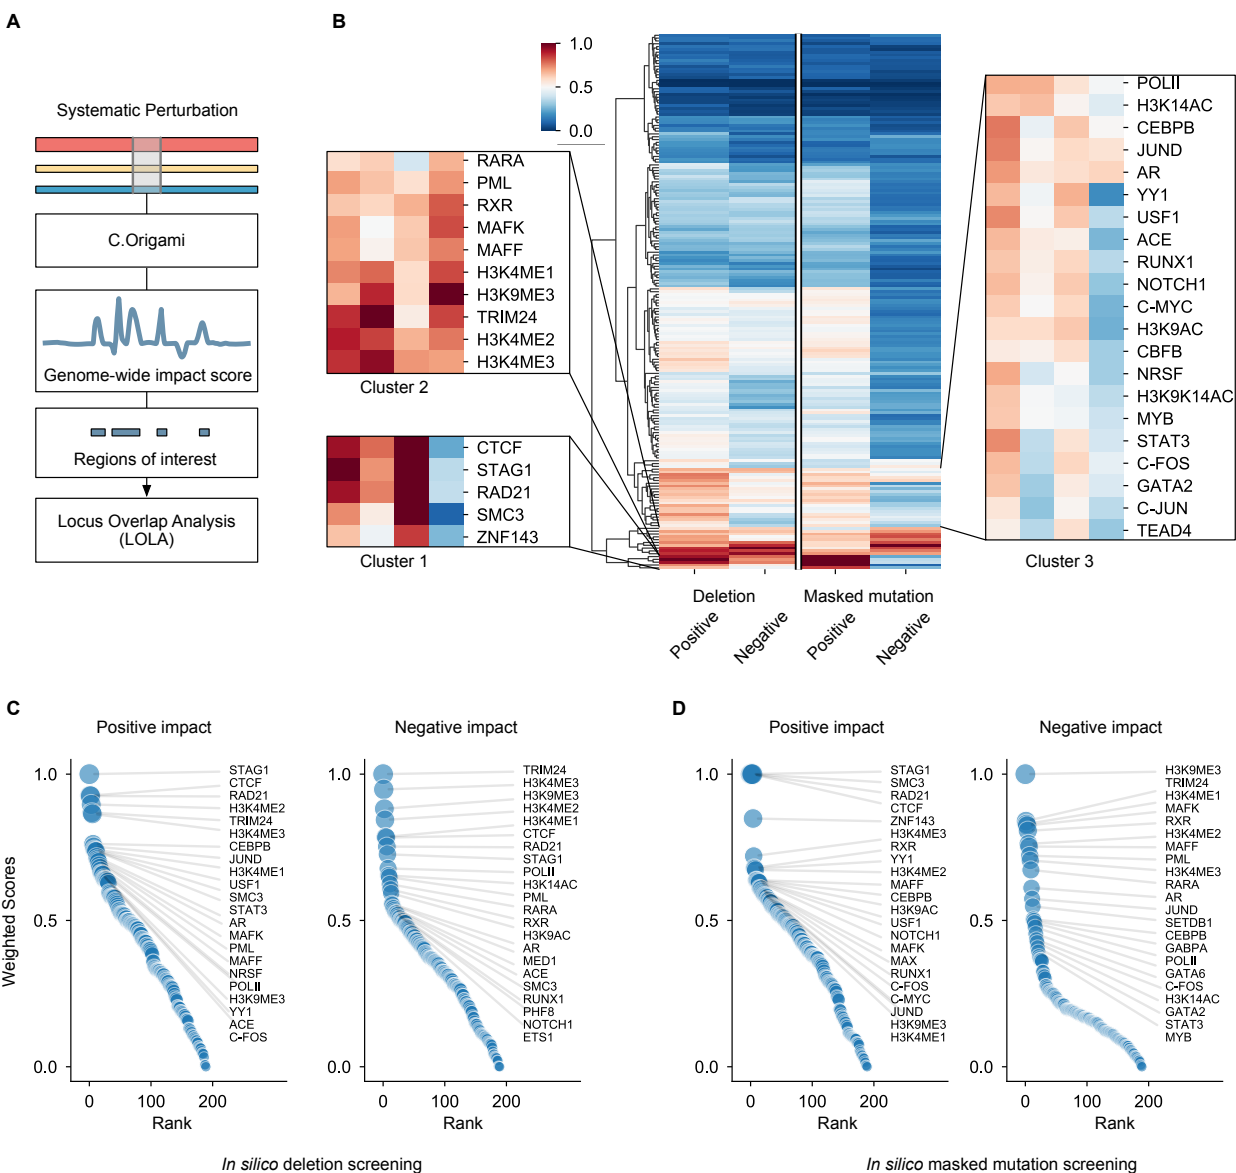

434  
435 **Figure 6: Genome-wide *in silico* screening uncovers *trans*-regulators of chromatin folding. a,**  
436 **Schematic of whole-genome *in silico* screening process. b, A heatmap of weighted scores across the four**  
437 **categories of *in silico* screen-determined contributing factors. The plot highlights three major clusters of**  
438 **contributing factors. c-d, *In silico* screening-identified contributing factors ranked by their weighted scores**  
439 **in each of the four categories as defined in b.**

440  
441  
442 Scanning throughout the genome separately in the two types of *in silico* screening allowed us to  
443 identify *trans*-acting factors important for chromatin structure (Fig. 6b). As expected, CTCF,  
444 together with other canonical factors such as RAD21, STAG1 and SMC3, were significantly

445 enriched in the positive impact score categories due to their role in determining TAD boundaries  
446 (Fig. 6b, cluster 1). These factors did not stand out in the negative score category of mutation  
447 screening due to CTCF masking, acting as a negative control for the results.

448

449 In contrast to the category enriched in the positive impact score group, we identified a cluster of  
450 factors which strongly associated with both positive and negative impacts on chromatin folding in  
451 the screening experiments (Fig. 6b, cluster 2). Of note, this cluster was enriched in several histone  
452 modifications represented by H3K4me1/2/3, identifying active chromatin marks that are known to  
453 contribute to enhancer-promoter looping (Zhao et al., 2019). This cluster is also enriched for  
454 H3K9me3, a mark of constitutive heterochromatin, which is involved in shaping chromatin  
455 compartment boundaries (Feng et al., 2020).

456

457 In addition, the *in silico* screening identified multiple transcription factors which may function to  
458 modulate fine-scale chromatin interactions. The positive impact score categories enriched for  
459 many transcription factors (Fig. 6b, cluster 3), such as YY1, NOTCH, and GATA2, indicating that  
460 the *in silico* screening precisely identified these as critical factors for chromatin interactions, in line  
461 with previous studies (Petrovic et al., 2019; Weintraub et al., 2017; Wu et al., 2014). Beyond this,  
462 cluster 3 identified factors that were not previously known to have a role in modulating chromatin  
463 interactions, such as the stress response transcription factors JUND and C-JUN. Interestingly,  
464 other AP-1 family proteins such as FOS, have been reported to alter chromatin interactions of  
465 their targeting genes (Beagan et al., 2020). Together, our *in silico* genetic screen confidently  
466 recognized critical chromatin architecture regulators, highlighting its potential for identifying a  
467 compendium of *trans*-acting factors and discovering novel regulation in determining chromatin  
468 interactions.

469

## 470 **Discussion:**

471

472 Cell type-specific gene expression profiles require unique chromatin folding patterns. In this study,  
473 we developed a novel deep neural network model, C.Origami, that synergistically incorporates  
474 both DNA sequence and cell type-specific genomic features for *de novo* prediction of 3D genome  
475 architecture. We found that CTCF binding together with DNA sequence was not sufficient for  
476 accurately predicting cell type-specific chromatin architecture. Additional features such as cell  
477 type-specific chromatin states play an essential role in chromatin interactions (Stergachis et al.,  
478 2014; Thurman et al., 2012). Consistent with this, we found that incorporating chromatin

479 accessibility data into C.Origami provided enough information for accurately predicting chromatin  
480 architecture, mirroring the results of a high-quality Hi-C experiment. The C.Origami model  
481 achieves high accuracy in *de novo* predicting cell type-specific chromatin architecture. This high  
482 performance and minimal requirement on input data make it practical for *de novo* prediction of Hi-  
483 C contact maps. The predicted Hi-C contact matrices can be further analyzed and interpreted  
484 through other available computational tools for inferring TADs, enhancer-promoter interactions,  
485 and higher-order chromosomal structures (Forcato et al., 2017; Lu et al., 2020; Szabo et al., 2018).

486

487 C.Origami model learned critical features from DNA sequences and cell type-specific information  
488 from the CTCF binding and ATAC-seq profiles, thus achieving high performance in *de novo*  
489 prediction of cell type-specific chromatin architecture. Other methods for predicting chromatin  
490 architecture either lack cell type-specificity or require substantial amount of input data, making  
491 them not practical for studying chromatin architecture underlying gene expression regulation. It is  
492 worth mentioning that, while preparing the manuscript, another method, Epiphany, was developed  
493 for cell type-specific prediction of Hi-C contact matrices using five input genomic profiles (Yang et  
494 al., 2021). Compared with Epiphany, C.Origami achieved high-quality prediction with minimal  
495 input data.

496

497 With highly accurate prediction of chromatin architecture, our model enables *in silico* genetic  
498 perturbation as a tool to study how *cis*-regulatory elements determine 3D chromatin architecture  
499 in a cell type-specific manner. C.Origami is able to accurately simulate the changes in chromatin  
500 architecture upon genetic perturbation within seconds and without the need to perform  
501 experimental studies. The low cost and high speed of C.Origami simulation make it useful in  
502 studies requiring frequent measurement of chromatin architecture, such as cancer genomics  
503 involving widespread genome rearrangement and synthetic regulatory genomics with *de novo*  
504 regulatory circuit construction (Pingley et al., 2021; Rabbitts, 1994; Spielmann et al., 2018).

505

506 Expanding the throughput of *in silico* genetic perturbations, we performed genome-wide *in silico*  
507 screening of features using deletion and masked mutation experiments in IMR-90 cells. This  
508 screening allowed us to determine the compendium of *trans*-acting regulators determining the  
509 chromatin architecture in a cell type-specific manner. This compendium not only includes  
510 canonical factors for determining chromatin architecture, such as CTCF, RAD21, STAG1 and  
511 SMC3, but also transcription factors that potentially function through modulating fine-scale  
512 chromatin structure for the regulation of gene expression. Meanwhile, the *in silico* screening

513 identified *cis*-regulatory elements free of CTCF binding and ATAC-seq signals, indicating potential  
514 uncharacterized regulatory sequences in the genome. We postulate that systematic *in silico*  
515 screening could be generally applicable in discovering novel 3D genome regulatory mechanisms  
516 and identifying the specific compendium of regulators across different cell types.

517  
518 We demonstrated that by integrating cell type-specific genomic features and DNA sequence  
519 features, C.Origami model is capable of predicting complex genomic features such as 3D  
520 chromatin architecture with high accuracy. The underlying architecture of our model, Origami, is  
521 generalizable beyond 3D genome structure prediction. Origami can be trained with appropriate  
522 genomic datasets for predicting cell type-specific genomic features, such as epigenetic  
523 modifications. Ultimately, we expect future genomics study to shift towards using tools that  
524 leverage high-capacity machine learning models to perform *in silico* experiments for discovering  
525 novel genomic regulation.

526

527

## 528 **Acknowledgement**

529 A.T. is supported by the NCI/NIH P01CA229086, NCI/NIH R01CA252239, NCI/NIH  
530 R01CA260028 and NIH/NCI R01CA140729. I.A. is supported by the NIH R01CA266212,  
531 R01CA242020, R01CA228135 and P01CA229086. JS is supported by the R35GM122515, P01  
532 CA229086 and P30CA016087. We would like to thank the Genome Technology Center (GTC) for  
533 expert library preparation and sequencing, and the Applied Bioinformatics Laboratories (ABL) for  
534 providing bioinformatics support and helping with the analysis and interpretation of the data. GTC  
535 and ABL are shared resources partially supported by the Cancer Center Support Grant  
536 P30CA016087 at the Laura and Isaac Perlmutter Cancer Center. This work has used computing  
537 resources at the NYU School of Medicine High Performance Computing (HPC) Facility. We would  
538 like to thank Sudarshan Pingley, Jef Boeke, Huiyuan Zhang, and the members of the Tsirigos lab  
539 for suggestions and discussion.

540

## 541 **Author contribution**

542 J.T. and B.X. conceived the project. J.T., B.X. and A.T. designed the experiments and interpreted  
543 the results. J.T. designed, implemented and optimized the neural network, and performed all the  
544 downstream computational analysis. J.R. helped with processing the sequencing data. F.B.  
545 generated ATAC-seq for CUTLL1. J.T. prepared figures with inputs from B.X., A.T. and D.F. T.S.,

546 J.S., I.A. and D.F. contributed to discussion. B.X., J.T. and A.T. wrote the manuscript with input  
547 from all authors.

548

549 **Competing interests**

550 A.T. is a scientific advisor to Intelligencia AI. I.A. is a consultant for Foresite Labs. J.T, B.X and

551 A.T are inventors on a filed patent covering the models and tools reported herein. All other authors

552 declare no competing interests.

553

554 **Methods:**

555

556 **Hi-C data:**

557 We used seven human and mouse Hi-C profiles in this study: IMR-90, GM12878, H1-hESC,  
558 K562, CUTLL1, T cell, Mouse ESC (Supplemental Table 1). All the data are available on GEO  
559 ([www.ncbi.nlm.nih.gov/geo](http://www.ncbi.nlm.nih.gov/geo)) and 4D Nucleome Data Portal (<https://data.4dnucleome.org>).

560

561

| Cell Type | Enzyme | Accession Number | Reference          |
|-----------|--------|------------------|--------------------|
| IMR-90    | Mbol   | GSE63525         | Rao et al.         |
| GM12878   | Mbol   | GSE63525         | Rao et al.         |
| H1-hESC   | Arima  | 4DNESFSCP5L8     | Calandrelli et al. |
| K562      | Mbol   | GSE63525         | Rao et al.         |
| CUTLL1    | Arima  | GSE115896        | Kloetgen et al.    |
| T cell    | Arima  | GSE115896        | Kloetgen et al.    |
| Mouse ESC | Arima  | GSE140363        | Nishana et al.     |

562 Supplementary Table 1

563

564 **Hi-C data preprocessing:**

565 To minimize bias in preprocessing, we obtained counts data in raw fastq format. The reads from  
566 human cell lines were aligned to GRCh38 human reference genome and mouse cell lines are  
567 aligned to mm10 mouse genome. The alignments were filtered at 10kb resolution and iteratively  
568 corrected with HiC-bench (Lazaris et al., 2017). To ensure the compatibility of prediction result  
569 with downstream softwares, we only used the a reversible natural log transform to process the  
570 Hi-C prediction targets. Prediction from C.Origami with exponential transformation can be  
571 directly used as Hi-C data for any downstream analysis.

572

573 **CTCF ChIP-seq and ATAC-seq data:**

574 All the CTCF ChIP-seq and ATAC-seq data for all cell-types are publicly available online from  
575 GEO ([www.ncbi.nlm.nih.gov/geo](http://www.ncbi.nlm.nih.gov/geo)) and ENCODE data portal ([www.encodeproject.org/](http://www.encodeproject.org/)). CUTLL1  
576 ATAC-seq is sequenced according to standard method (Buenrostro et al., 2015). Details on  
577 accession number are listed in Supplemental Table 2. To maintain signal consistency across  
578 different cell lines, we aggregated fastq data from different replicates and subsampled them  
579 down to 40 million reads. The reads were processed by Seq-N-Slide to generate bigWig files  
580 (<https://doi.org/10.5281/zenodo.6308846>). The bigWig was used as regular, dense inputs to our  
581 model. To prepare an alternative sparse input format, we used MACS2 to perform peak calling  
582 on the intermediate bam files to obtain sparse peaks for CTCF and ATAC-seq (Zhang et al.,

583 2008). The sparse narrowPeak file was converted back to bigWig with ucscutils. We took the  
584 natural log of both dense and sparse bigWig files and used them as inputs to the model.

585  
586

| Cell Type | CTCF ChIP-seq | ATAC-seq           |
|-----------|---------------|--------------------|
| IMR-90    | ENCSR000EFI   | ENCSR200OML        |
| GM12878   | ENCSR000AKB   | ENCSR095QNB        |
| H1-hESC   | ENCSR000AMF   | GSE85330           |
| K562      | ENCSR000AKO   | ENCSR483RKN        |
| CUTLL1    | GSE115893     | see Methods CTULL1 |
| T cell    | GSE115893     | GSE168880          |
| Mouse ESC | GSE140363     | GSE140363          |

587 Supplementary Table 2

588

### 589 **DNA sequence**

590 We used the reference DNA-sequence from UCSC. The original fasta file includes four types of  
591 nucleotides and “n” for unknown type with upper- and lower-case letters which represent (repeat  
592 sequences). We retained the ‘n’ category and encoded each nucleotide as a 5 channel one-hot  
593 vector representing ATCGN. The same sequence is used for all cell types.

594

### 595 **Training data:**

596 The training data consists of DNA sequence, CTCF signal, ATAC-seq signal and Hi-C matrix on  
597 the IMR-90 cell line. The input data to the model is sequence, CTCF ChIP-seq signal, ATAC-  
598 seq signal at a 2,097,152 bp region and the output target is the Hi-C matrix at the corresponding  
599 regions. The original Hi-C matrix was originally called at 10Kb resolution and downsampled 8,192  
600 bp to match the model output resolution. To generate batches of training data, we defined 2Mb  
601 sliding windows across the genome with 40kb steps. Windows that have overlap with telomere  
602 or centromere were removed. We split training, validation and test set by chromosome.

603 Chromosome 10 is used as the validation set and Chromosome 15 as the test set. The rest of  
604 the chromosomes are used as the training set.

605

### 606 **Model Architecture:**

607 The model is implemented with the PyTorch framework. Our model consists of two 1D  
608 convolutional encoders, a transformer module and a 2D convolutional decoder. To adapt to  
609 input channels of sequence and genomic features. The sequence encoder has 5 input  
610 channels, and the genomic feature encoder has 2 input channels. The two encoders have  
611 similar structures otherwise. Each encoder starts with a 1D convolution header with stride 2 to  
612 half the size of the 2m bp input before it goes to convolution blocks to reduce memory cost. To



613 reduce the input length down to 256, we deployed 12 convolution modules each of which  
614 consists of a residual block and a scaling block. The residual block has 2 sets of convolution  
615 layers with kernel width 5 and same padding. Batch normalization and ReLU nonlinearity follows  
616 each conv layer, and the start and end position of the residual block is connected by a residual  
617 connection. Residual blocks keep the same dimension of inputs and promote information  
618 propagation. The scaling block consists of a 1D convolutional layer with kernel size 5 and stride  
619 2 followed by batch normalization and ReLU activation. The scaling block reduces input length  
620 by a factor of 2 and increases the number of hidden layers. We increase the hidden size  
621 according to this schedule: 32, 32, 32, 32, 64, 64, 128, 128, 128, 128, 256, 256. The output from  
622 the last scaling module has length 256 with 256 channels.

623

624 The transformer module is built with 8 customized attention layers adopted from Huggingface  
625 Bert implementation(Devlin et al., 2018). Specifically, we set the number of hidden layers to  
626 256, ReLU as the activation function and used 8 attention heads. We used relative key query as  
627 positional embedding and set the maximum length to be 256.

628

629 After the transformer module, we concatenate each position in the 256 bins to every other  
630 position to form a 256 by 256 interaction map. The concatenation function takes the 256-bin  
631 sequence from the feature extraction module and outputs a 256 by 256 grid where location (i, j)  
632 is a concatenation of the features at i and j position. Then a 1-dimensional distance matrix is  
633 calculated and appended to the grid. The distance matrix value at location (i, j) is the Manhattan  
634 Distance between point (i, i) and (j, j) on the grid divided by 2. Since each bin has 256 channels,  
635 after concatenation and addition of the distance matrix, we arrived at an output of 256 by 256  
636 with 513 channels. The decoder consists of 5 dilated residual networks. We set the dilation  
637 factor to be 2, 4, 8, 16, 32 so that the receptive field at the last layer covers the input space. At  
638 the end of the decoder, we use a Conv2D layer with 1x1 kernel to combine 256 channels down  
639 to 1 channel and the output is a 256 by 256 matrix with one channel.

640

641 The 256x256 output from the model is compared with ground truth Hi-C map via a mean  
642 squared error (MSE) loss. The loss is back propagated through the whole network for gradient  
643 updates.

644

### 645 **Data augmentation**

646 To avoid overfitting, we implemented 3 types of data augmentations. 1) During training, we  
647 dynamically selected the 2Mb window with random shifts between plus and minus 0.36 mb  
648 range. 2) We reverse complemented the sequence and flipped the target Hi-C matrix with 0.5  
649 chance. 3) We added gaussian noise to sequence, CTCF and ATAC-seq signal with zero mean  
650 and 0.1 standard deviation.

651

### 652 **Model Training:**

653 To train the model we used a training batch size of 8 and Adam optimizer with learning rate  
654 0.002. The cosine learning rate scheduler with 200 epoch period is used for stabilizing training.  
655 The minimal validation loss is achieved when the model is trained for 54 epochs. We trained the  
656 model for 18 hours on a GPU cluster with 4 NVIDIA Tesla V100 GPUs with 320GB RAM to

657 store training data. To prevent bottlenecking from the data loading process, we used 8 CPU  
658 workers to load data and assigned 10 CPU cores in total for the training procedure. Model  
659 inference with a mobile NVIDIA RTX 2060 GPU can be achieved in under 1 second and  
660 inference on an Intel i7-8750H CPU is around 3 seconds.

661

### 662 **Insulation Score:**

663 Insulation score is implemented as the ratio of maximum left and right region average intensity  
664 and the middle region intensity. We also added a pseudo-count calculated from chromosome  
665 wide average intensity to prevent division by zero in unmappable regions. The insulation score  
666 can be formulated as follows:

667 
$$\text{Insulation} = (\max(\text{avg}(\text{Left Region}), \text{avg}(\text{Right Region})) + \text{pseudocount}) / (\text{avg}(\text{Center Region})$$
  
668 
$$+ \text{pseudocount})$$

669

### 670 **Fused chromosome prediction:**

671 Most downstream analysis on Hi-C is conducted on Hi-C contact matrices at the level of a  
672 chromosome. To bridge the gap between our 2Mb window prediction and over 100mb  
673 chromosome, we applied window fusion to construct chromosome wide prediction from  
674 individual 2Mb prediction windows. We run the prediction in a sliding window of step size  
675 262,144 bp which is 1/8 of the 2Mb prediction window. All predictions are in-painted to their  
676 corresponding location on the contact map. Most regions are covered by prediction for 8 times,  
677 and regions like the beginning of the chromosome are only covered for 1 time. To correct for  
678 different levels of overlap, we calculated times of overlap for every pixel and applied  
679 corresponding scaling factors. The resulting chromosome wide prediction can be directly used  
680 for downstream analysis tasks like insulation score (Supplementary Fig. 6).

681

### 682 **Stratified intensity and correlation**

683 Stratified intensity and correlation are based on fused chromosome prediction. Stratified  
684 intensity at distance  $i$  is calculated by aggregating the line that is parallel to the diagonal with  
685 offset of  $i$ . Stratified correlation is calculated as Pearson's  $r$  between the shifted diagonal line of  
686 prediction and ground truth.

687

### 688 **CUTLL1 translocation**

689 CUTLL1 translocation is heterozygous, and this property adds more complexity to its  
690 corresponding Hi-C matrix. Hi-C matrix is called from interactions between two genomics loci  
691 but we do not have information on which chromatid this loci is located, so there is no way to call  
692 Hi-C matrix for only the translocation. Since only one chromatid has translocation, the measured  
693 Hi-C matrix is a combination of both translocation and normal state. To align with this hybrid Hi-  
694 C map, we predicted the Hi-C map for Chr7Chr9 translocation chromatid and Chr7 and Chr9  
695 without translocation. The interaction between Chromosome 7 and Chromosome 9 is an  
696 average of the interaction in the Chr7Chr9 in the translocated chromatid and the inter-  
697 chromosomal interaction between Chromosome 7 and Chromosome 9. We do not count the  
698 inter-chromosomal interaction because it is relatively weak compared to interaction at the  
699 translocation. The predicted interaction on Chromosome 7 until breakpoint chr7:142,797,952 is

700 averaged with the translocated prediction. Similarly, predicted interaction on chr9 starting  
701 136,502,817 is also averaged with translocation prediction.

702

### 703 **Mouse prediction**

704 For mouse prediction, we trained the model with sparse genomic features as inputs. To obtain  
705 sparse features, we called peaks for CTCF ChIP-seq and ATAC-seq with MACS2 from the bam  
706 files generated by the Seq-N-Slide pipeline.

707

### 708 **In silico genetic deletion experiment**

709 We conducted genetic screening on the 2Mb window by systematically removing segments from  
710 model inputs. We selected deletion windows of 8192 bp or 1 bin on the predicted matrix. To  
711 scan the entire region, we performed 256 deletion experiments at each bin and calculated the  
712 prediction difference map before and after deletion. Deletion reduces the input length from  
713 2,097,152 bp to 2,088,960 bp. To maintain input shape, we appended 8192 bp of the following  
714 region.

715

### 716 **Reducing impact and sensitivity score from 3D voxels**

717 Screening by deletion produces a 3D voxel with coordinates (i, j, k) where the first two  
718 dimensions (i, j) correspond to the Hi-C matrix difference and the third dimension k denotes  
719 deletion locus. Under this framework, the impact score can be defined as reducing the first two  
720 dimensions (i, j) with mean or sum, denoting the overall intensity shift with respect to deletion.  
721 The sensitivity score can be defined as the result of reducing either of the first two dimensions (i  
722 or j) and the third deletion dimension k. From another perspective, sensitivity score of a locus  
723 denotes average intensity shift over all deletions with respect to its location.

724

### 725 **GRAM (Gradient-weighted Regional Activate Mapping)**

726 This scoring system is a generalized version of Grad-CAM on 2D outputs (Selvaraju et al.,  
727 2017). Instead of taking a single output, GRAM operates on a region  $r$  in the output space and  
728 runs backpropagation on all pixels within  $r$ . GRAM on region  $r$  in network layer  $m$  is defined as  
729 follows:

730

$$GRAM_m^r = \sum_k |\alpha_k^r| |A_k^r|$$

731 Where  $\alpha_k^r$  is the activation weight for channel  $k$  and region  $r$ , is calculated by the average  
732 gradient at the layer  $m$ .  $A_k^r$  is the activation in channel  $k$  at layer  $m$ . In this study, we choose  $r$  to  
733 be the full output space.

734

### 735 **CTCF-masked mutation**

736 For the given mutation range, we randomly change the nucleotides at all locations. The region  
737 that is under a CTCF ChIP-seq peak is kept unchanged. To accommodate the peak signal used  
738 in this task, we used the sparse model for this screening experiment.

739

### 740 **In silico genome-wide genetic screen**

741 For both deletion and masked mutation, we performed saturated editing with 20Kb width and  
742 step size. Specifically, we defined a 20Kb edit region at the center of the 2Mb window. The

743 inputs within the 20Kb region are modified and we predict the Hi-C matrix from the modified  
744 inputs. Then we measure the intensity shift of the entire 2Mb window and move to the next  
745 window which is downstream with a 20Kb offset. After whole genome screening, we obtain a  
746 genome-wide impact score for every 20Kb perturbation.

747

748 LOLA (Locus Overlap Analysis) takes a genomic region set and compares it to a set of core  
749 databases and calculates enrichment score for every feature in the database (Sheffield and  
750 Bock, 2016). The enrichment score is calculated with fisher's exact test on a contingency table.  
751 The two sets of conditions of the contingency table are defined as present/absent and  
752 query/database. The query region is the genomic region we are testing and database regions  
753 are from a target database feature that we are comparing against. LOLA also requires a  
754 universe set which we choose to be the whole genome with 20Kb widths.

755

756 To generate a set of genomic regions from our impact score, we choose a sliding window of  
757 size 2Mb and step 20Kb across the genome and aggregate the region with the highest impact  
758 scores. These regions are then merged to continuous regions and formatted to a bed file as  
759 input (query set in LOLA) to LOLA. The background input (universe set in LOLA) to LOLA is  
760 selected as the entire genome with offsets of 20kb. Since high impact can be either positive and  
761 negative, we also generated regions with lowest impact scores and tested its enrichment.

762

763 The output from LOLA is processed by merging and filtering different features. For features with  
764 the same antibody name, only the highest ranked one was kept for analysis. Features without  
765 antibody name are removed. Then we filtered out the features with odds ratio less than 2 in all  
766 four categories: deletion positive/negative and mutation positive/negative. We collected 191  
767 relevant factors and ranked them according to by a weighted score defined as min-max  
768 normalized  $-\log_{10}(\text{q-value})$ . We then visualized the relationship between different transcription  
769 factors with heatmaps and hierarchical clustering.

770

771

772

773 **Supplementary Figures:**

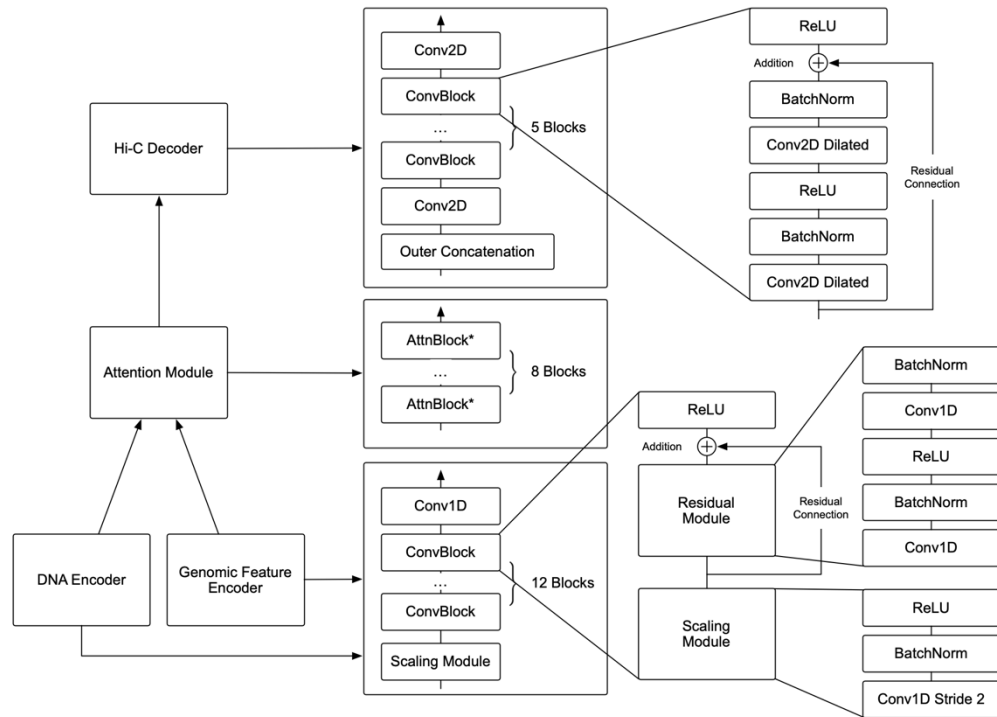

774

775 **Supplementary Figure 1: C.Origami model structure and module components.**

776 A detailed schematic of C.Origami model architecture. The DNA encoder and Genomic Feature encoder have similar  
777 architectures and they only differ in input channels where DNA encoder has 5 and Feature encoder has  
778 2. To encode data, we built the encoder with 12 convolution blocks, each consisting of a scaling module  
779 and residual module. The scaling module downscales input features by a factor of 2 with a stride-2 1D  
780 convolution layer. The residual module promotes information propagation in very deep networks (REF Deep  
781 Residual Learning for Image Recognition). The number of modules was carefully chosen such that we scale  
782 the 2,097,152 input down to 256 bins at the end of the encoder. To enhance interactions within the 2Mb  
783 window, we used an attention module that consists of 8 attention blocks modified from the transformer  
784 architecture. Each position of the output is concatenated with every other position to form a 2D matrix,  
785 resembling a vector outer-product process. To refine the final prediction, we used a 5-layer dilated 2D  
786 convolutional network as decoder. We deliberately chose the dilation parameters to ensure that every  
787 position at the last layer has a receptive field covering the input range.

788

789

790

791

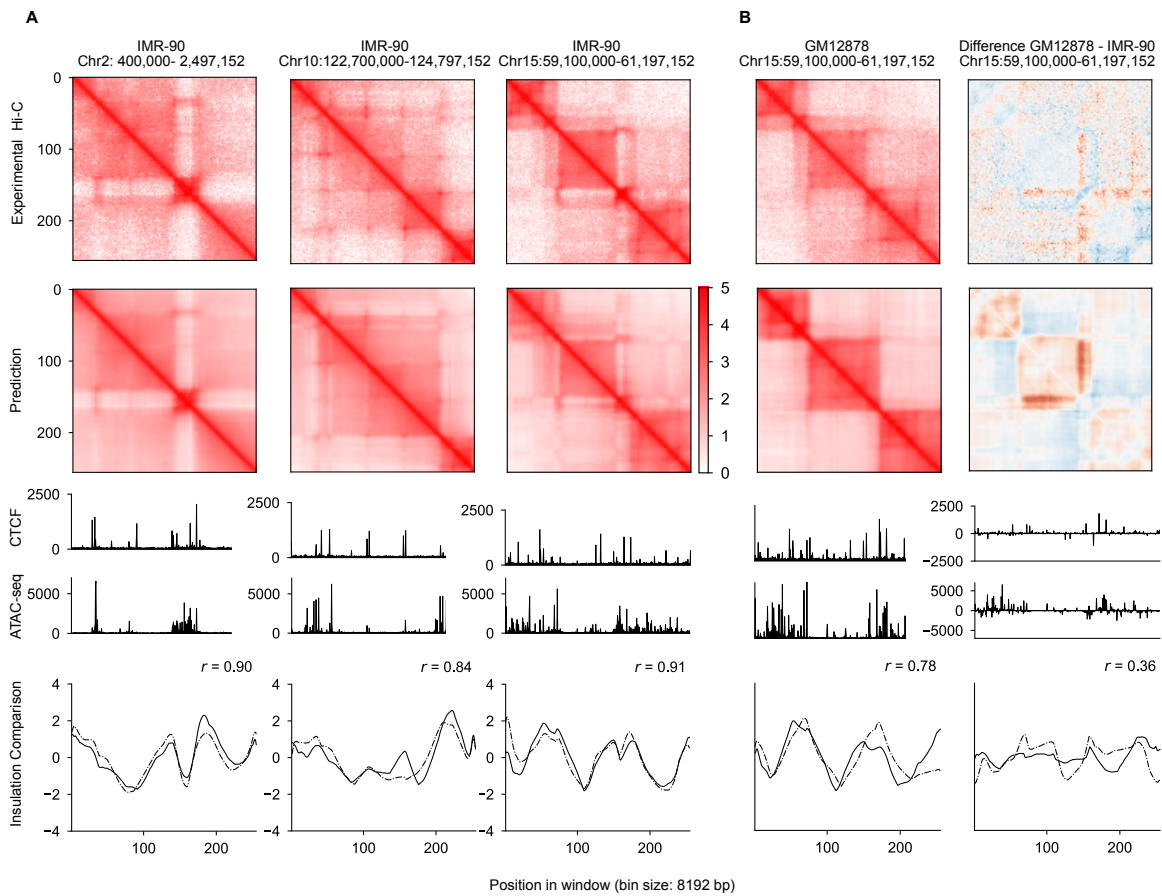

792

793 **Supplementary Figure 2: Performance of C.Origami trained with DNA sequence and CTCF binding**

794 **profiles. a**, Predicting chromatin architecture using a model trained with DNA sequence and CTCF binding

795 profiles. The plots were organized the same as Fig. 2 a-d. **b**, *De novo* predicting chromatin architecture of

796 the chromosome 15 locus in GM12878 using the model trained with DNA sequence and CTCF binding

797 profiles. The difference between IMR-90 and GM12878 were presented on the right. While C.Origami

798 trained with DNA sequence and CTCF profile achieved good performance in validation and test set in IMR-

799 90 (a), it missed predicting some fine-scale chromatin structures in GM12878.

800

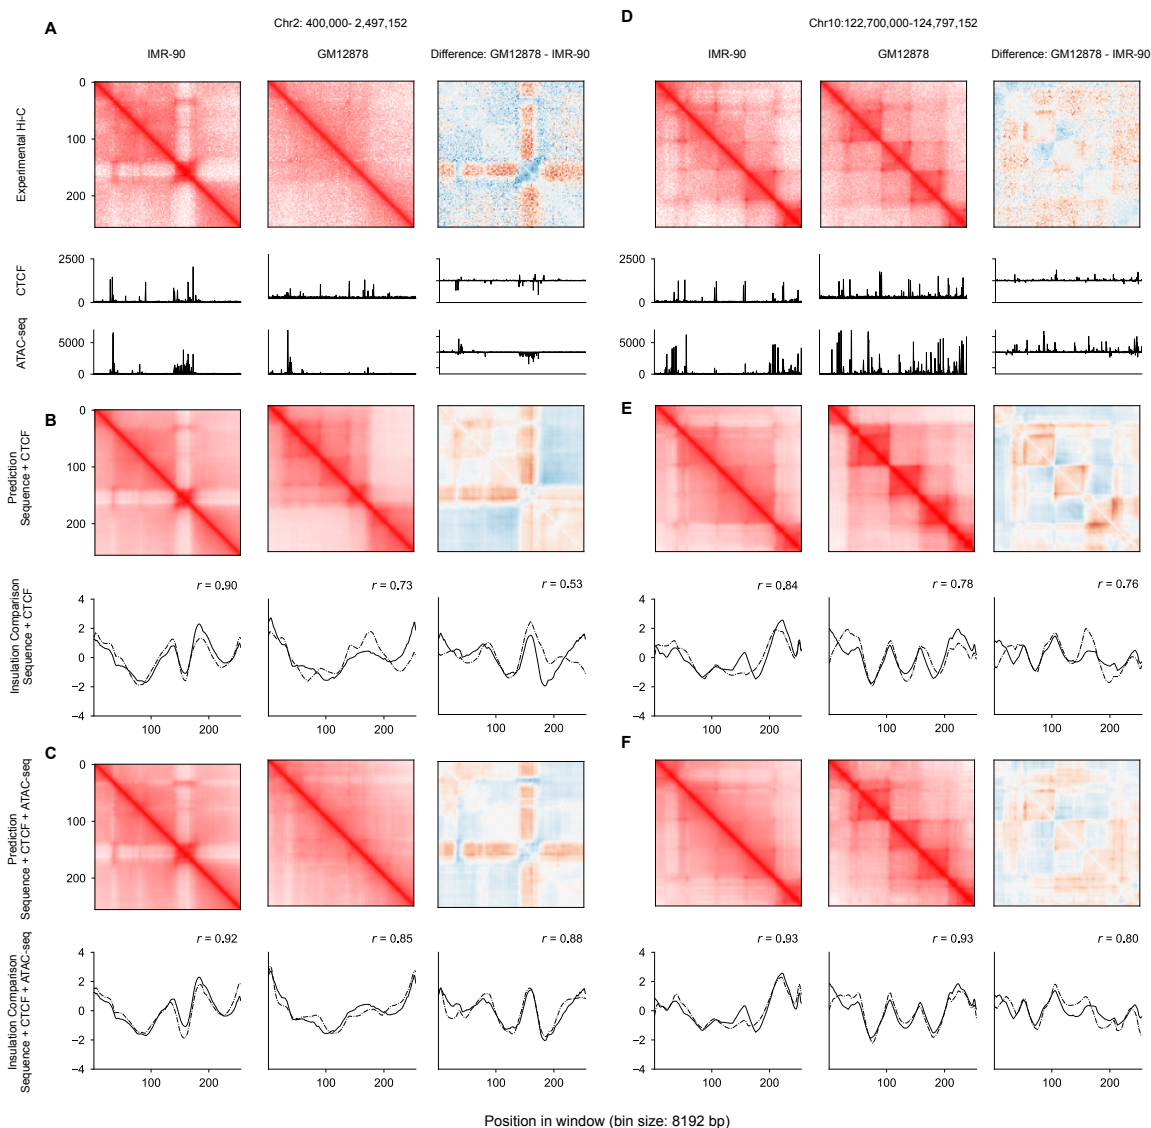

801  
 802 **Supplementary Figure 3: C.Origami trained with DNA sequence, CTCF binding, and chromatin**  
 803 **accessibility profiles performed optimally.** a, Experimental Hi-C matrices and genomic profiles of IMR-  
 804 90 and GM12878 cells at chr2:400,000-2,497,152. The difference between the two cell lines were  
 805 presented on the right. b-c, Cell type-specific prediction of the chromatin architecture at the same locus  
 806 using C.Origami models trains with DNA sequence and CTCF binding (b) or DNA sequence, CTCF binding,  
 807 and chromatin accessibility profiles (c). d-e, Same as a-c at a difference locus, chr10:122,700,000-  
 808 122,797,152.

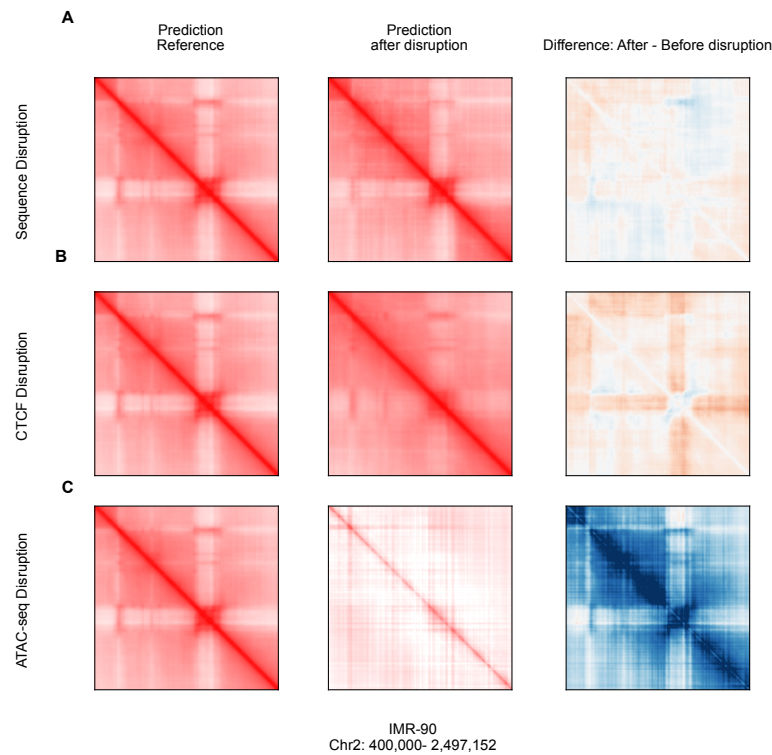

809

810 **Supplementary Figure 4: Ablation study on different input features.** Using the C.Origami model trained  
811 with DNA sequence, CTCF binding, and chromatin accessibility profiles, the experiment was performed  
812 by random shuffling DNA sequences at base pair level (**a**), random shuffling CTCF signal (**b**), and random  
813 shuffling ATAC-seq signal (**c**). From left to right, reference prediction with all inputs (left), prediction with  
814 sequence shuffled (middle), difference between perturbed prediction and reference prediction (right).



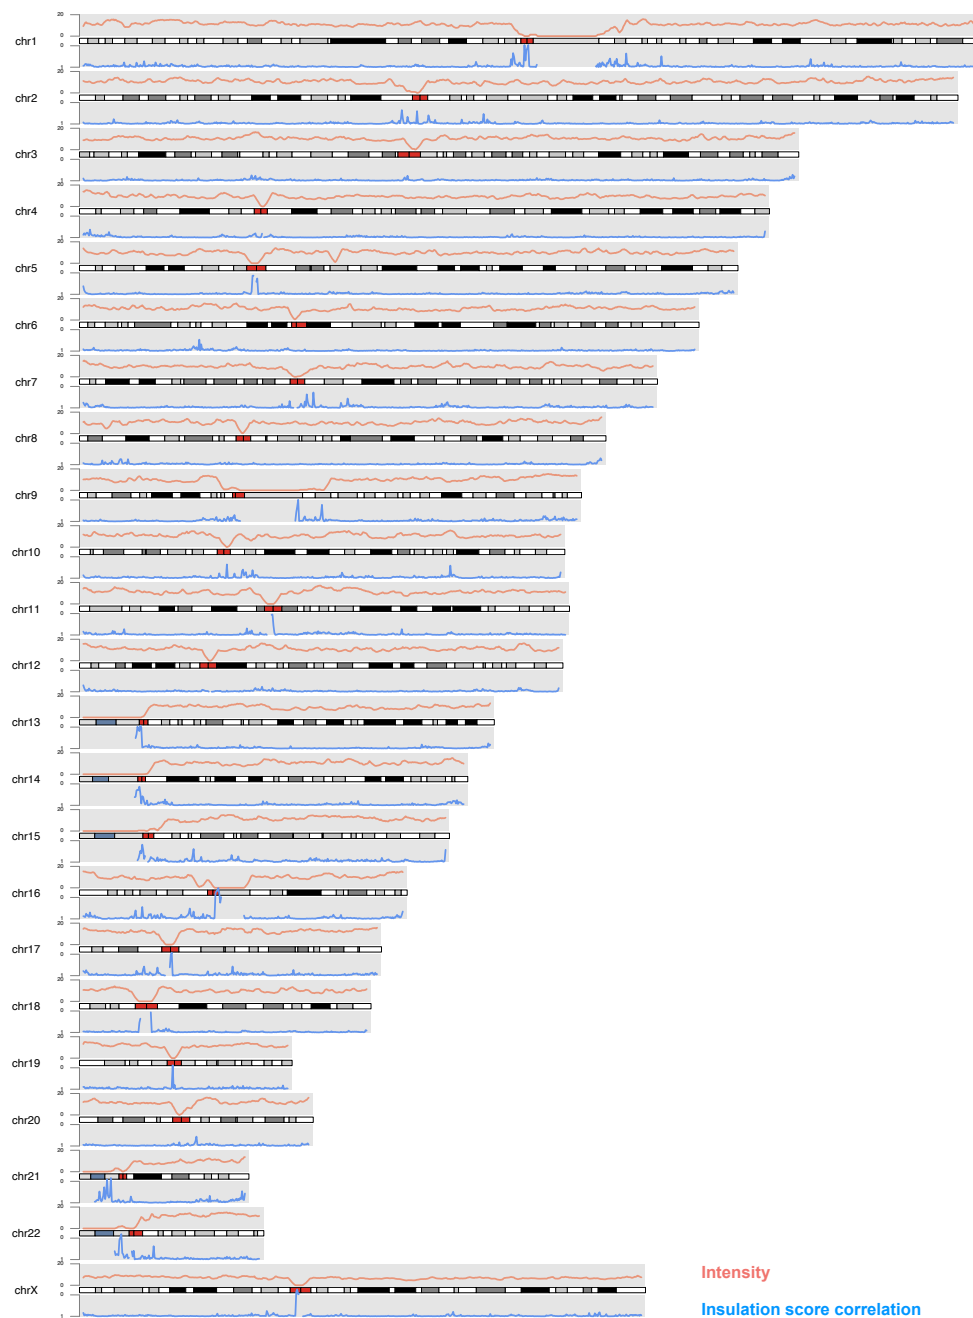

815

816 **Supplementary Figure 5: Chromosome karyotype visualization along with chromosome-wide Hi-C**  
817 **intensity and correlation of insulation scores.** The results were visualized using karyoploteR (Gel and  
818 Serra, 2017). Chromosome 1 to chromosome X were plotted to visualize the Pearson correlation  
819 coefficients of insulation scores calculated from prediction and that from experimental Hi-C. Average  
820 intensity of 2Mb windows were plotted in red. Centromere regions were denoted with red segments on the  
821 genome.

822

823

824

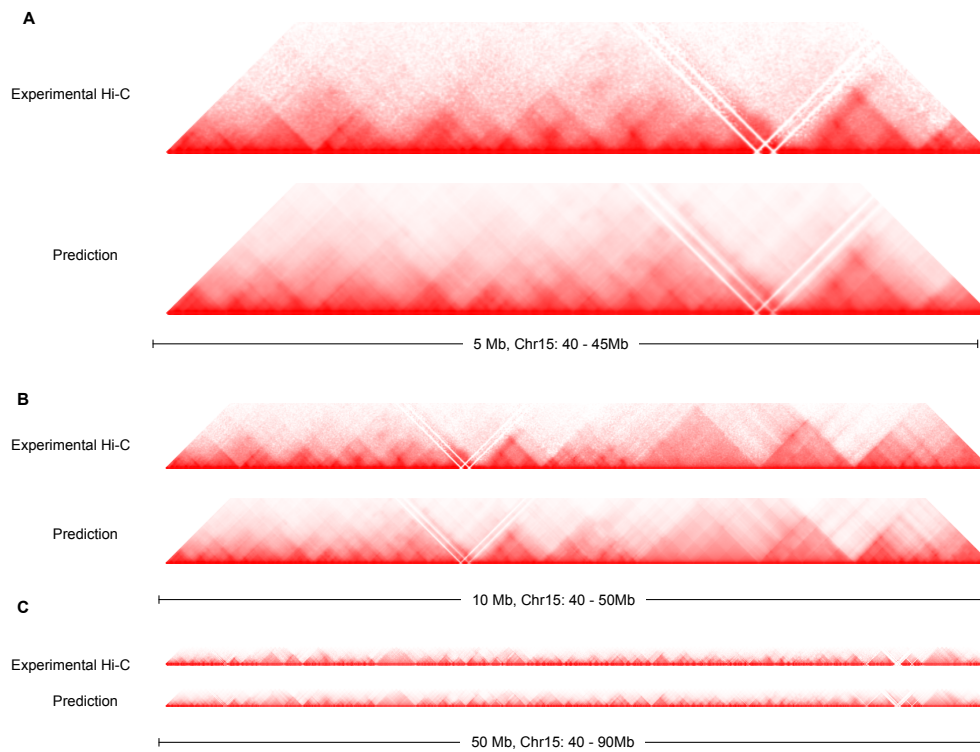

825

826 **Supplementary Figure 6: Fusing C.Origami-predicted 2Mb Hi-C maps into larger interaction maps.**

827 The predicted 2Mb Hi-C maps were fused to 5Mb (a), 10Mb (b), and 50Mb (c) on chromosome 15, all with

828 the same starting site at 40 Mb.

829

830

831

832

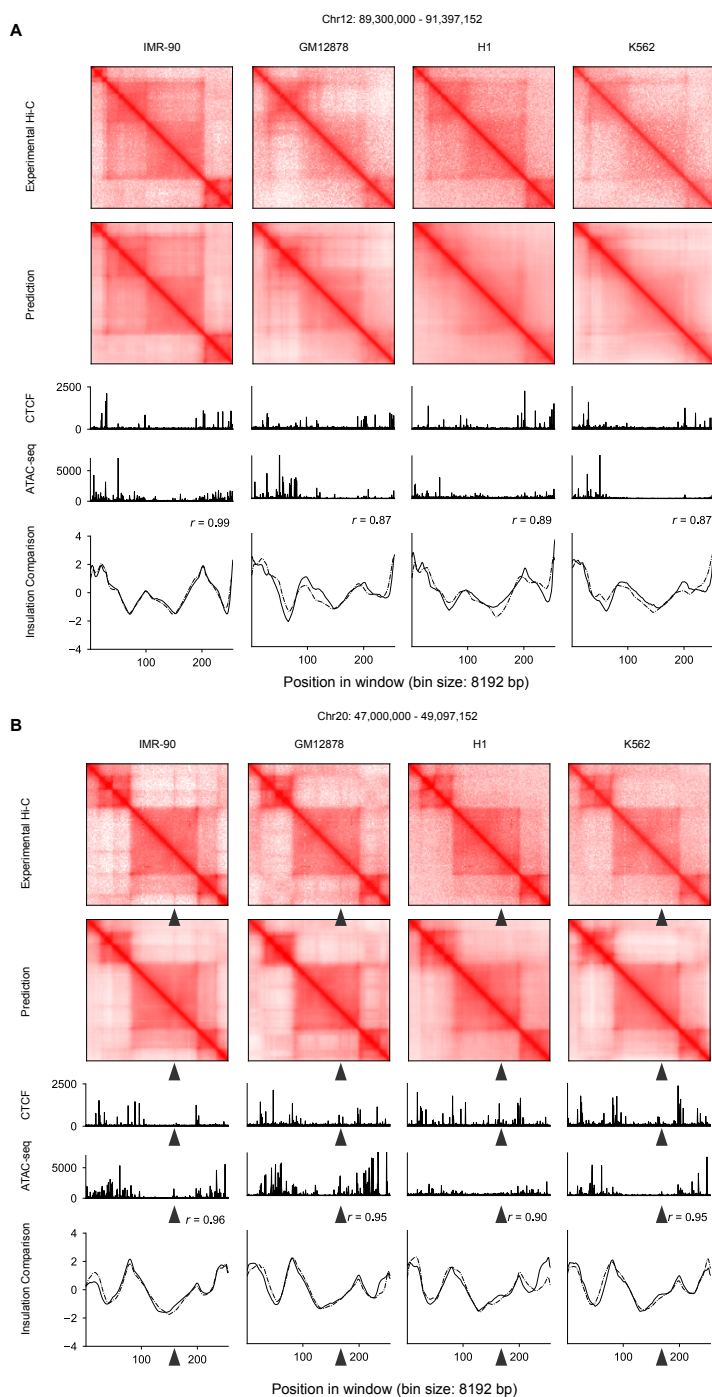

833  
834 **Supplementary Figure 7: C.Origami predicts chromatin architectures across multiple cell types.** Two  
835 representative loci were separately presented across IMR-90, GM12878, H1-hESCs, and K562 in **a** and **b**.  
836 From top to bottom, each panel included experimental Hi-C matrix, predicted Hi-C matrix, CTCF and ATAC-  
837 seq signals, and insulation scores calculated from experimental and predicted Hi-C data.

838

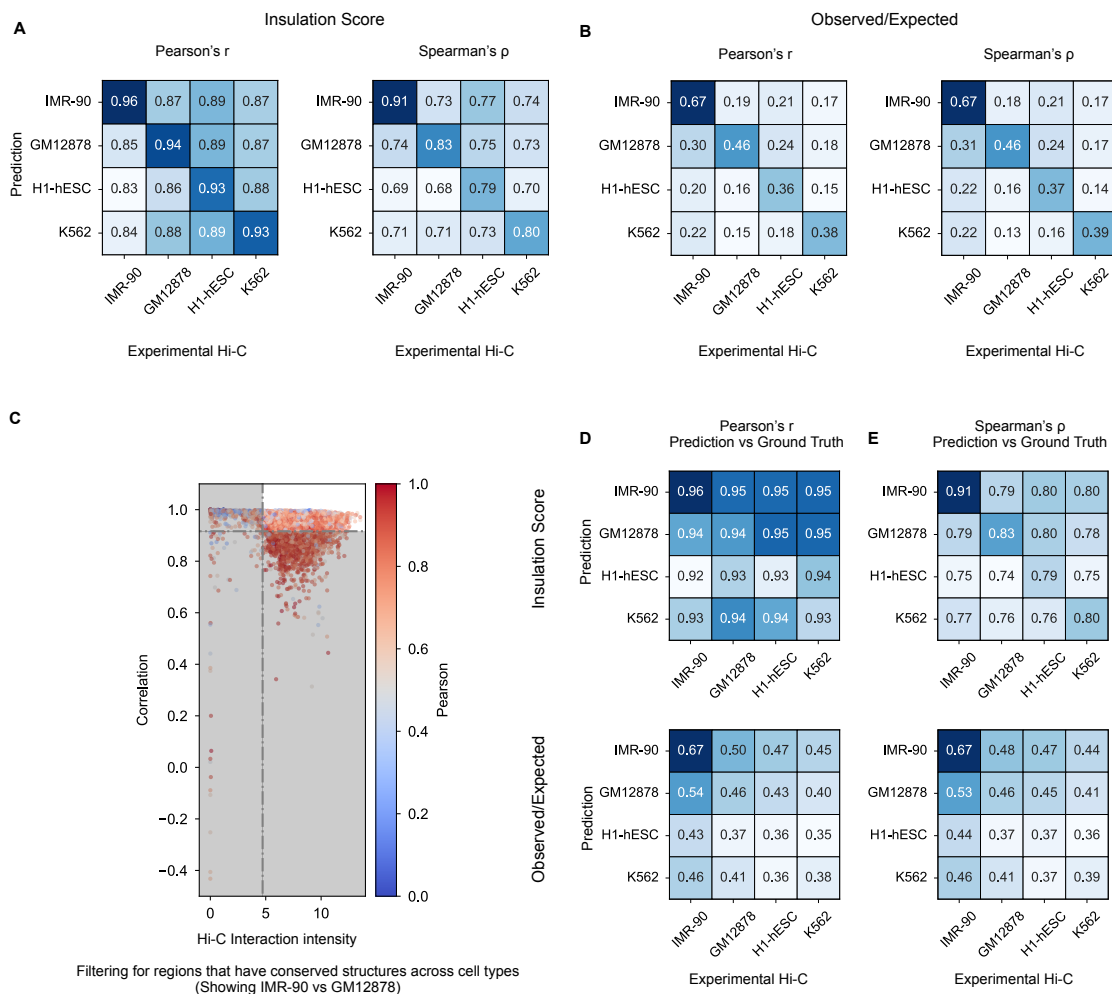

839

840 **Supplementary Figure 8: Genome-wide statistics on cell type-specific prediction performance. a-b,**  
 841 Pearson's  $r$  (left) and Spearman's  $\rho$  (right) between prediction (row) and experimental data (column) for  
 842 different cell types with insulation score (a) and observed/expected score (b) as metrics. The scores were  
 843 calculated based on the differentially structured loci defined in Fig. 3. The correlation between  
 844 Observed/Expected contact matrices was lower due to higher background noise. c, selecting structurally  
 845 conserved loci across different cell types. Conserved subset accounts for ~60% of the data. d-e, Same as  
 846 a-b but for the structurally conserved loci across different cell types.

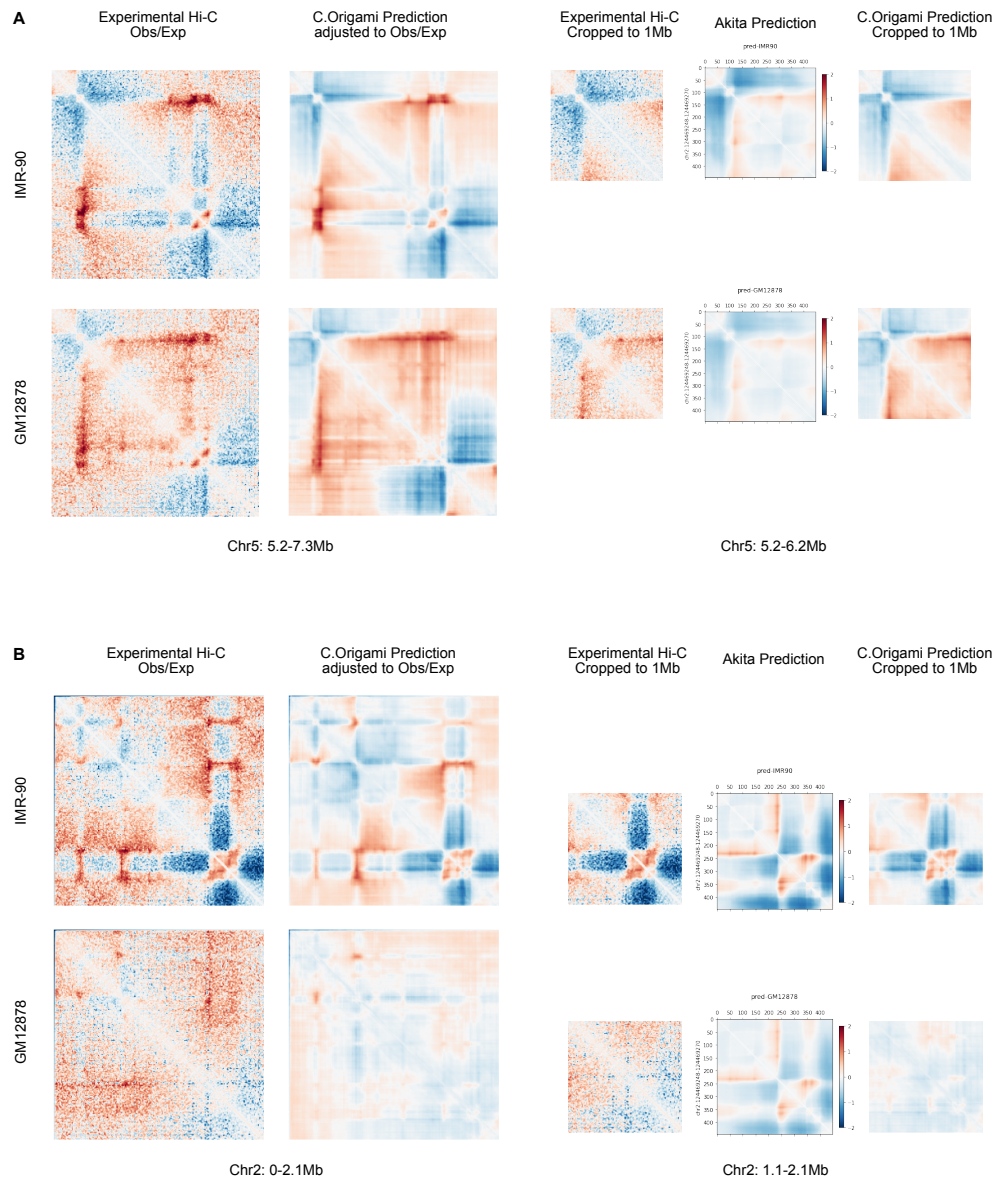

847

848 **Supplementary Figure 9: Comparing the performance of C.Origami with Akita in cell-type specific**

849 **prediction.** Two represented loci were presented (a-b). Each locus includes the experimental Hi-C matrix

850 together with the C.Origami prediction in IMR-90 cells and GM12878 cells (lef). Akita predicted chromatin

851 architectures in windows of 1Mb, thus fractioned Hi-C matrices were presented on the right for comparison.

852

853

854

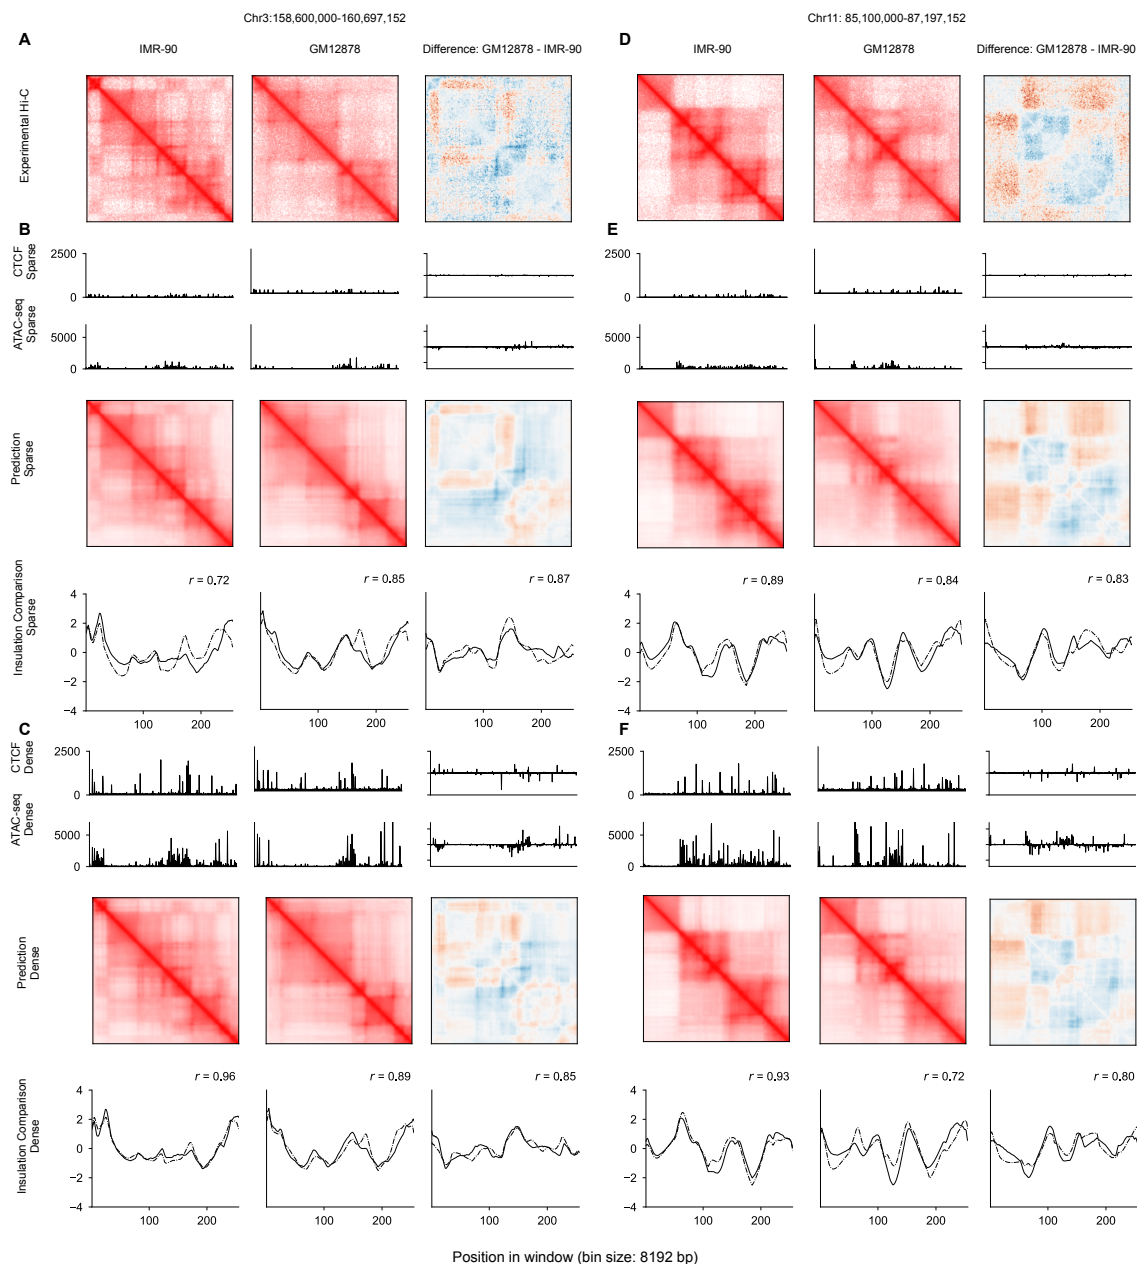

855  
 856 **Supplementary Figure 10: Performance comparison of C.Origami models trained with sparse**  
 857 **information and dense information. a,** Experimental Hi-C matrices and genomic profiles of IMR-90 and  
 858 GM12878 cells at chr3: 158,600,000-160,697,152. The difference between the two cell lines were  
 859 presented on the right. **b-c,** Cell type-specific prediction of the chromatin architecture at the same locus  
 860 using C.Origami models trains with sparse genomic information (**b**) or dense genomic information (**c**). **d-**  
 861 **e,** Same as **a-c** at a difference locus, chr10: 85,100,000-87,197,152.  
 862  
 863  
 864

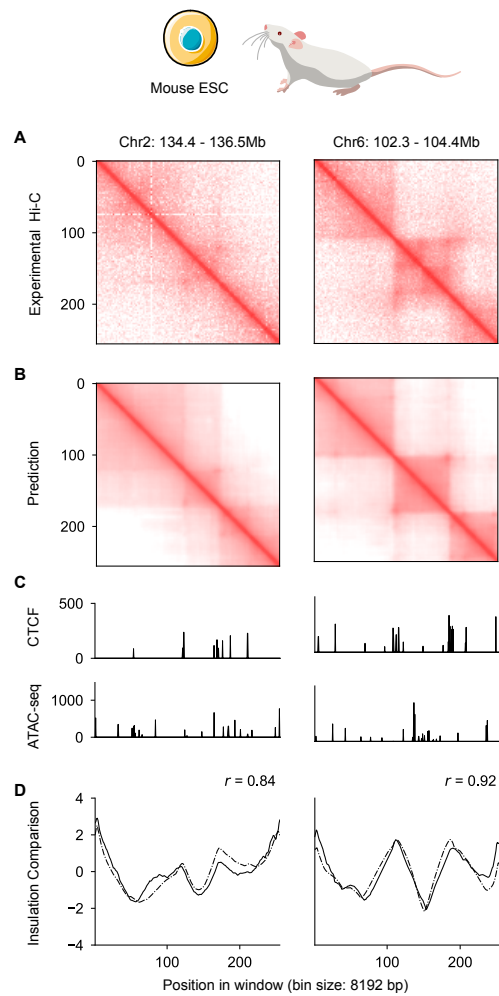

865

866 **Supplementary Figure 11: Mouse chromatin architecture prediction using C.Origami trained with**  
867 **human data.** Experimental Hi-C matrices (a), predicted Hi-C matrices (b), CTCF and ATAC-seq signals  
868 (c), and insulation scores calculated from experimental and predicted Hi-C data (d) were presented from  
869 top to bottom, each with two different loci.

870

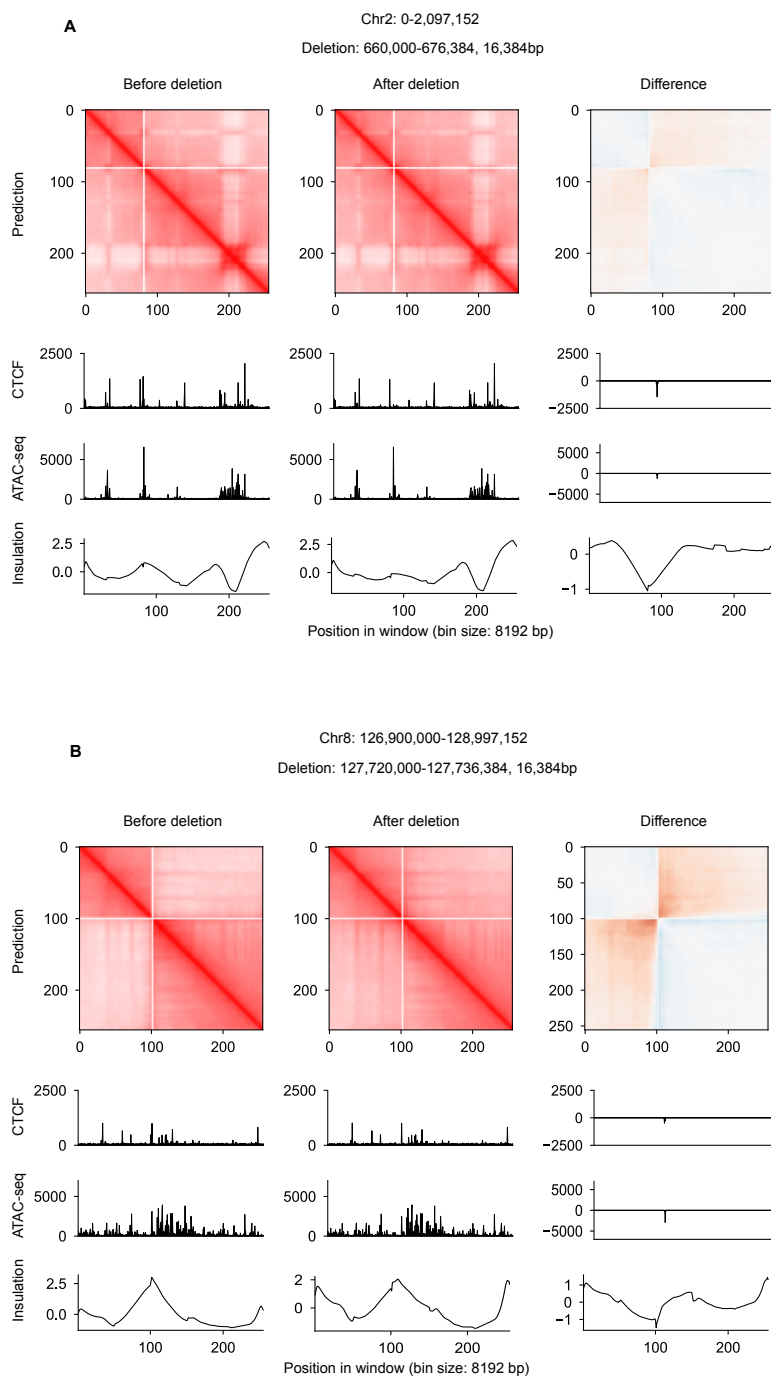

871  
872 **Supplementary Figure 12: *In silico* genetic experiments performed on IMR-90 cells.** Two *in silico*  
873 deletion experiments were separately represented in **a** and **b**. Each experiment included the prediction  
874 before (left) and after deletion (middle). The difference in chromatin folding after deletion were presented  
875 on the right.  
876  
877



878 **References**

- 879 Beagan, J.A., Pastuzyn, E.D., Fernandez, L.R., Guo, M.H., Feng, K., Titus, K.R.,  
880 Chandrashekar, H., Shepherd, J.D., and Phillips-Cremins, J.E. (2020). Three-dimensional  
881 genome restructuring across timescales of activity-induced neuronal gene expression. *Nat.*  
882 *Neurosci.* *23*, 707–717.
- 883 Belokopytova, P.S., Nuriddinov, M.A., Mozheiko, E.A., Fishman, D., and Fishman, V. (2020).  
884 Quantitative prediction of enhancer-promoter interactions. *Genome Res.* *30*, 72–84.
- 885 Bianco, S., Lupiáñez, D.G., Chiariello, A.M., Annunziatella, C., Kraft, K., Schöpflin, R., Wittler,  
886 L., Andrey, G., Vingron, M., Pombo, A., et al. (2018). Polymer physics predicts the effects of  
887 structural variants on chromatin architecture. *Nat. Genet.* *50*, 662–667.
- 888 Buenrostro, J.D., Wu, B., Chang, H.Y., and Greenleaf, W.J. (2015). ATAC-seq: a method for  
889 assaying chromatin accessibility genome-wide. *Curr. Protoc. Mol. Biol.* *109*, 21.29.1–21.29.9.
- 890 Cao, F., Zhang, Y., Cai, Y., Animesh, S., Zhang, Y., Akincilar, S.C., Loh, Y.P., Li, X., Chng,  
891 W.J., Tergaonkar, V., et al. (2021). Chromatin interaction neural network (ChINN): a machine  
892 learning-based method for predicting chromatin interactions from DNA sequences. *Genome*  
893 *Biol.* *22*, 226.
- 894 Cheng, Y., Ma, Z., Kim, B.-H., Wu, W., Cayting, P., Boyle, A.P., Sundaram, V., Xing, X., Dogan,  
895 N., Li, J., et al. (2014). Principles of regulatory information conservation between mouse and  
896 human. *Nature* *515*, 371–375.
- 897 Devlin, J., Chang, M.-W., Lee, K., and Toutanova, K. (2018). BERT: Pre-training of Deep  
898 Bidirectional Transformers for Language Understanding. *arXiv*.
- 899 Dixon, J.R., Selvaraj, S., Yue, F., Kim, A., Li, Y., Shen, Y., Hu, M., Liu, J.S., and Ren, B. (2012).  
900 Topological domains in mammalian genomes identified by analysis of chromatin interactions.  
901 *Nature* *485*, 376–380.
- 902 Eraslan, G., Avsec, Ž., Gagneur, J., and Theis, F.J. (2019). Deep learning: new computational  
903 modelling techniques for genomics. *Nat. Rev. Genet.* *20*, 389–403.
- 904 Feng, Y., Wang, Y., Wang, X., He, X., Yang, C., Naseri, A., Pederson, T., Zheng, J., Zhang, S.,  
905 Xiao, X., et al. (2020). Simultaneous epigenetic perturbation and genome imaging reveal distinct  
906 roles of H3K9me3 in chromatin architecture and transcription. *Genome Biol.* *21*, 296.
- 907 Forcato, M., Nicoletti, C., Pal, K., Livi, C.M., Ferrari, F., and Bicciato, S. (2017). Comparison of  
908 computational methods for Hi-C data analysis. *Nat. Methods* *14*, 679–685.
- 909 Franke, M., Ibrahim, D.M., Andrey, G., Schwarzer, W., Heinrich, V., Schöpflin, R., Kraft, K.,  
910 Kempfer, R., Jerković, I., Chan, W.-L., et al. (2016). Formation of new chromatin domains  
911 determines pathogenicity of genomic duplications. *Nature* *538*, 265–269.

- 912 Fudenberg, G., Kelley, D.R., and Pollard, K.S. (2020). Predicting 3D genome folding from DNA  
913 sequence with Akita. *Nat. Methods* 17, 1111–1117.
- 914 Gel, B., and Serra, E. (2017). karyoploteR: an R/Bioconductor package to plot customizable  
915 genomes displaying arbitrary data. *Bioinformatics* 33, 3088–3090.
- 916 Kagey, M.H., Newman, J.J., Bilodeau, S., Zhan, Y., Orlando, D.A., van Berkum, N.L., Ebmeier,  
917 C.C., Goossens, J., Rahl, P.B., Levine, S.S., et al. (2010). Mediator and cohesin connect gene  
918 expression and chromatin architecture. *Nature* 467, 430–435.
- 919 Kloetgen, A., Thandapani, P., Ntziachristos, P., Ghebrechristos, Y., Nomikou, S., Lazaris, C.,  
920 Chen, X., Hu, H., Bakogianni, S., Wang, J., et al. (2020). Three-dimensional chromatin  
921 landscapes in T cell acute lymphoblastic leukemia. *Nat. Genet.* 52, 388–400.
- 922 Lazaris, C., Kelly, S., Ntziachristos, P., Aifantis, I., and Tsirigos, A. (2017). HiC-bench:  
923 comprehensive and reproducible Hi-C data analysis designed for parameter exploration and  
924 benchmarking. *BMC Genomics* 18, 22.
- 925 Lettice, L.A., Heaney, S.J.H., Purdie, L.A., Li, L., de Beer, P., Oostra, B.A., Goode, D., Elgar, G.,  
926 Hill, R.E., and de Graaff, E. (2003). A long-range Shh enhancer regulates expression in the  
927 developing limb and fin and is associated with preaxial polydactyly. *Hum. Mol. Genet.* 12, 1725–  
928 1735.
- 929 Lieberman-Aiden, E., van Berkum, N.L., Williams, L., Imakaev, M., Ragoczy, T., Telling, A.,  
930 Amit, I., Lajoie, B.R., Sabo, P.J., Dorschner, M.O., et al. (2009). Comprehensive mapping of  
931 long-range interactions reveals folding principles of the human genome. *Science* 326, 289–293.
- 932 Lu, L., Liu, X., Huang, W.-K., Giusti-Rodríguez, P., Cui, J., Zhang, S., Xu, W., Wen, Z., Ma, S.,  
933 Rosen, J.D., et al. (2020). Robust Hi-C Maps of Enhancer-Promoter Interactions Reveal the  
934 Function of Non-coding Genome in Neural Development and Diseases. *Mol. Cell* 79, 521–  
935 534.e15.
- 936 Lupiáñez, D.G., Kraft, K., Heinrich, V., Krawitz, P., Brancati, F., Klopocki, E., Horn, D., Kayserili,  
937 H., Opitz, J.M., Laxova, R., et al. (2015). Disruptions of topological chromatin domains cause  
938 pathogenic rewiring of gene-enhancer interactions. *Cell* 161, 1012–1025.
- 939 Narendra, V., Rocha, P.P., An, D., Raviram, R., Skok, J.A., Mazzoni, E.O., and Reinberg, D.  
940 (2015). CTCF establishes discrete functional chromatin domains at the Hox clusters during  
941 differentiation. *Science* 347, 1017–1021.
- 942 Palomero, T., Barnes, K.C., Real, P.J., Glade Bender, J.L., Sulis, M.L., Murty, V.V., Colovai,  
943 A.I., Balbin, M., and Ferrando, A.A. (2006). CUTLL1, a novel human T-cell lymphoma cell line  
944 with t(7;9) rearrangement, aberrant NOTCH1 activation and high sensitivity to gamma-secretase  
945 inhibitors. *Leukemia* 20, 1279–1287.

- 946 Petrovic, J., Zhou, Y., Fasolino, M., Goldman, N., Schwartz, G.W., Mumbach, M.R., Nguyen,  
947 S.C., Rome, K.S., Sela, Y., Zapataro, Z., et al. (2019). Oncogenic Notch Promotes Long-Range  
948 Regulatory Interactions within Hyperconnected 3D Cliques. *Mol. Cell* 73, 1174–1190.e12.
- 949 Phillips-Cremins, J.E., Sauria, M.E.G., Sanyal, A., Gerasimova, T.I., Lajoie, B.R., Bell, J.S.K.,  
950 Ong, C.-T., Hookway, T.A., Guo, C., Sun, Y., et al. (2013). Architectural protein subclasses  
951 shape 3D organization of genomes during lineage commitment. *Cell* 153, 1281–1295.
- 952 Di Pierro, M., Cheng, R.R., Lieberman Aiden, E., Wolynes, P.G., and Onuchic, J.N. (2017). De  
953 novo prediction of human chromosome structures: Epigenetic marking patterns encode genome  
954 architecture. *Proc. Natl. Acad. Sci. USA* 114, 12126–12131.
- 955 Pinglay, S., Bulajic, M., Rahe, D.P., Huang, E., Brosh, R., German, S., Cadley, J.A., Rieber, L.,  
956 Easo, N., Mahony, S., et al. (2021). Synthetic genomic reconstitution reveals principles of  
957 mammalian Hox cluster regulation. *BioRxiv*.
- 958 Qi, Y., and Zhang, B. (2019). Predicting three-dimensional genome organization with chromatin  
959 states. *PLoS Comput. Biol.* 15, e1007024.
- 960 Rabbitts, T.H. (1994). Chromosomal translocations in human cancer. *Nature* 372, 143–149.
- 961 Rao, S.S.P., Huntley, M.H., Durand, N.C., Stamenova, E.K., Bochkov, I.D., Robinson, J.T.,  
962 Sanborn, A.L., Machol, I., Omer, A.D., Lander, E.S., et al. (2014). A 3D map of the human  
963 genome at kilobase resolution reveals principles of chromatin looping. *Cell* 159, 1665–1680.
- 964 Rowley, M.J., and Corces, V.G. (2018). Organizational principles of 3D genome architecture.  
965 *Nat. Rev. Genet.* 19, 789–800.
- 966 Schmitt, A.D., Hu, M., Jung, I., Xu, Z., Qiu, Y., Tan, C.L., Li, Y., Lin, S., Lin, Y., Barr, C.L., et al.  
967 (2016). A compendium of chromatin contact maps reveals spatially active regions in the human  
968 genome. *Cell Rep.* 17, 2042–2059.
- 969 Schoenfelder, S., and Fraser, P. (2019). Long-range enhancer-promoter contacts in gene  
970 expression control. *Nat. Rev. Genet.* 20, 437–455.
- 971 Schwessinger, R., Gosden, M., Downes, D., Brown, R.C., Oudelaar, A.M., Telenius, J., Teh,  
972 Y.W., Lunter, G., and Hughes, J.R. (2020). DeepC: predicting 3D genome folding using  
973 megabase-scale transfer learning. *Nat. Methods* 17, 1118–1124.
- 974 Selvaraju, R.R., Cogswell, M., and Das, A. (2017). Grad-cam: Visual explanations from deep  
975 networks via gradient-based localization. *Proceedings of the ...*
- 976 Sheffield, N.C., and Bock, C. (2016). LOLA: enrichment analysis for genomic region sets and  
977 regulatory elements in R and Bioconductor. *Bioinformatics* 32, 587–589.

- 978 Spielmann, M., Lupiáñez, D.G., and Mundlos, S. (2018). Structural variation in the 3D genome.  
979 *Nat. Rev. Genet.* *19*, 453–467.
- 980 Stergachis, A.B., Neph, S., Sandstrom, R., Haugen, E., Reynolds, A.P., Zhang, M., Byron, R.,  
981 Canfield, T., Stelhing-Sun, S., Lee, K., et al. (2014). Conservation of trans-acting circuitry during  
982 mammalian regulatory evolution. *Nature* *515*, 365–370.
- 983 Szabo, Q., Jost, D., Chang, J.-M., Cattoni, D.I., Papadopoulos, G.L., Bonev, B., Sexton, T.,  
984 Gurgo, J., Jacquier, C., Nollmann, M., et al. (2018). TADs are 3D structural units of higher-order  
985 chromosome organization in *Drosophila*. *Sci. Adv.* *4*, eaar8082.
- 986 Tang, Z., Luo, O.J., Li, X., Zheng, M., Zhu, J.J., Szalaj, P., Trzaskoma, P., Magalska, A.,  
987 Wlodarczyk, J., Ruszczycki, B., et al. (2015). CTCF-Mediated Human 3D Genome Architecture  
988 Reveals Chromatin Topology for Transcription. *Cell* *163*, 1611–1627.
- 989 Thurman, R.E., Rynes, E., Humbert, R., Vierstra, J., Maurano, M.T., Haugen, E., Sheffield,  
990 N.C., Stergachis, A.B., Wang, H., Vernet, B., et al. (2012). The accessible chromatin landscape  
991 of the human genome. *Nature* *489*, 75–82.
- 992 Vaswani, A., Shazeer, N., and Parmar, N. (2017). Attention is all you need. ... neural  
993 information ...
- 994 Weintraub, A.S., Li, C.H., Zamudio, A.V., Sigova, A.A., Hannett, N.M., Day, D.S., Abraham,  
995 B.J., Cohen, M.A., Nabet, B., Buckley, D.L., et al. (2017). YY1 Is a Structural Regulator of  
996 Enhancer-Promoter Loops. *Cell* *171*, 1573–1588.e28.
- 997 Wu, D., Sunkel, B., Chen, Z., Liu, X., Ye, Z., Li, Q., Grenade, C., Ke, J., Zhang, C., Chen, H., et  
998 al. (2014). Three-tiered role of the pioneer factor GATA2 in promoting androgen-dependent  
999 gene expression in prostate cancer. *Nucleic Acids Res.* *42*, 3607–3622.
- 1000 Yang, R., Das, A., Gao, V.R., Karbalayghareh, A., Noble, W.S., Bilmes, J.A., and Leslie, C.S.  
1001 (2021). Epiphany: predicting Hi-C contact maps from 1D epigenomic signals. *BioRxiv*.
- 1002 Zhang, S., Chasman, D., Knaack, S., and Roy, S. (2019). In silico prediction of high-resolution  
1003 Hi-C interaction matrices. *Nat. Commun.* *10*, 5449.
- 1004 Zhang, Y., Liu, T., Meyer, C.A., Eeckhoute, J., Johnson, D.S., Bernstein, B.E., Nusbaum, C.,  
1005 Myers, R.M., Brown, M., Li, W., et al. (2008). Model-based analysis of ChIP-Seq (MACS).  
1006 *Genome Biol.* *9*, R137.
- 1007 Zhao, L., Wang, S., Cao, Z., Ouyang, W., Zhang, Q., Xie, L., Zheng, R., Guo, M., Ma, M., Hu,  
1008 Z., et al. (2019). Chromatin loops associated with active genes and heterochromatin shape rice  
1009 genome architecture for transcriptional regulation. *Nat. Commun.* *10*, 3640.
- 1010 Zou, J., Huss, M., Abid, A., Mohammadi, P., Torkamani, A., and Telenti, A. (2019). A primer on  
1011 deep learning in genomics. *Nat. Genet.* *51*, 12–18.
